# Supplementary material
Source: PubMed Central journal article supplement (PMC8690223)
Supplement: mmc1.pdf [file mmc1.pdf]

**Supplementary figure 1.**

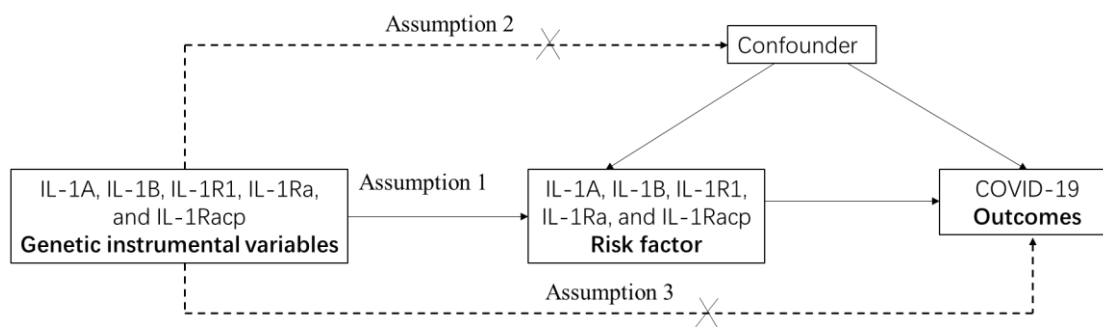

**Supplementary figure 1. The design flow chart for the Mendelian randomization**

**(MR) study.** MR assumptions: assumption 1, 2 and 3. Solid line represents direct causal effects that IL-1A, IL-1B, IL-1R1, IL-1Ra, and IL-1Racp genetic instrumental variants are reliably associated with IL-1A, IL-1B, IL-1R1, IL-1Ra, and IL-1Racp levels, respectively and influence the risk of Corona Virus Disease 2019 (COVID-19) through the IL-1A, IL-1B, IL-1R1, IL-1Ra, and IL-1Racp, respectively, in assumption 1. Dotted line represents that IL-1A, IL-1B, IL-1R1, IL-1Ra, and IL-1Racp genetic instrumental variants are not associated with any measured and unmeasured confounders and do not influence the risk of COVID-19 through other pathways in assumption 2 and 3, respectively.

## Supplementary figure 2.

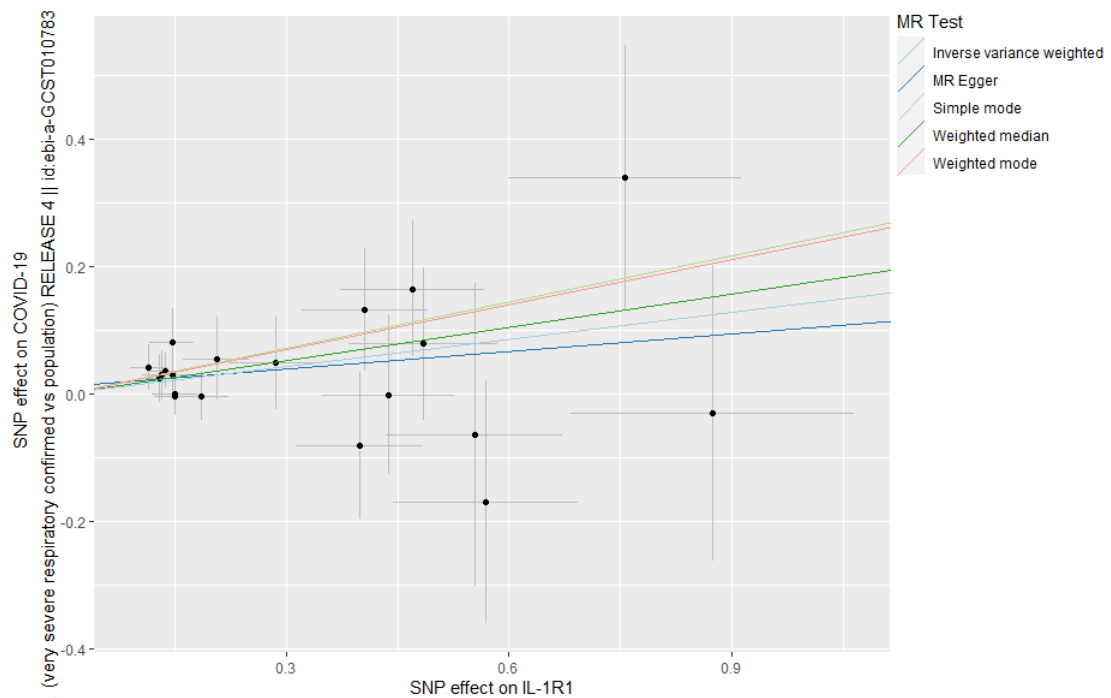

**Supplementary figure 2. Individual estimates about the causal effect of IL-1R1 on COVID-19.** The x-axis shows the SNP (single nucleotide polymorphism) effect and SE (standard error) on each of IL-1R1. The y-axis shows the SNP effect and SE on COVID-19 by analyzing GWAS ID: ebi-a-GCST010783 (very severe respiratory confirmed vs population). The regression line for MR Egger, Weighted median, IVW, Simple mode, and Weighted mode is shown.

**Supplementary figure 3.**

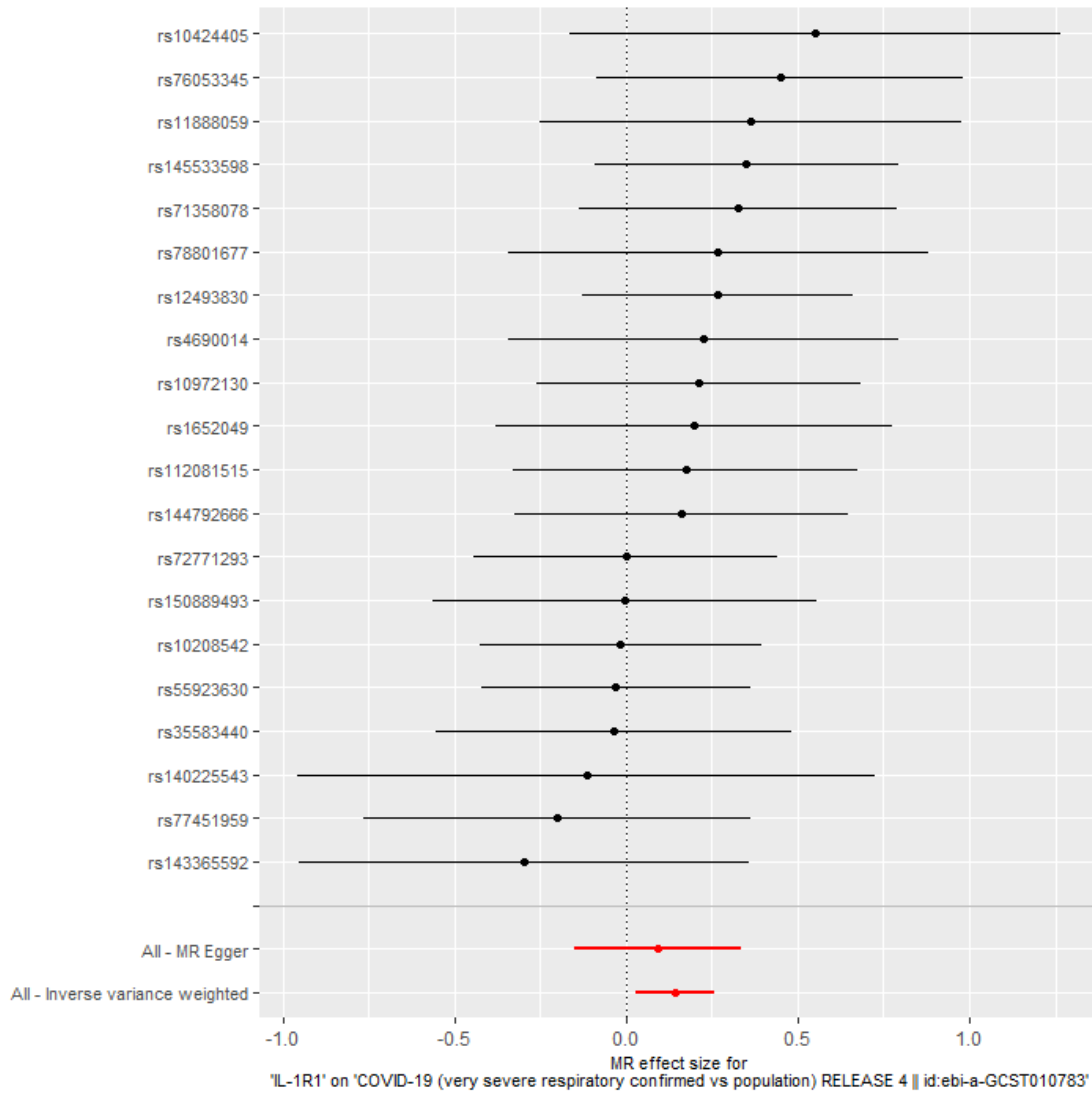

**Supplementary figure 3. Forest plot of IL-1R1 associated with risk of COVID-19.**

The x-axis shows MR effect size for IL-1R1 on COVID-19 by analyzing GWAS ID: ebi-a-GCST010783 (very severe respiratory confirmed vs population). The y-axis shows the analysis for each of SNPs.

**Supplementary figure 4.**

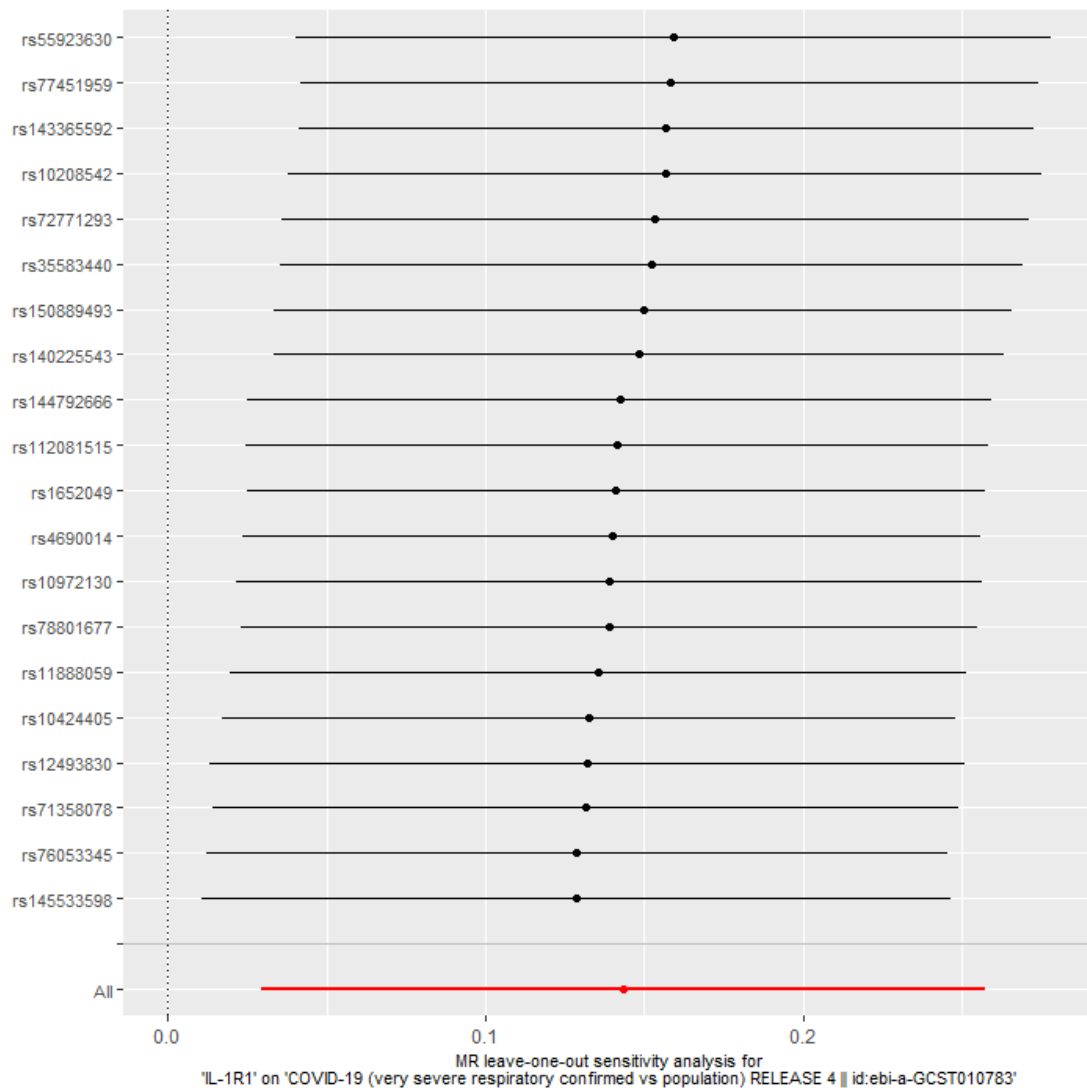

**Supplementary figure 4. MR leave-one-out sensitivity analysis for the effect of IL-1R1 SNPs on COVID-19.** The x-axis shows MR leave-one-out sensitivity analysis for IL-1R1 on COVID-19 by analyzing GWAS ID: ebi-a-GCST010783 (very severe respiratory confirmed vs population). The y-axis shows the analysis for the effect of leave-one-out of SNPs on COVID-19.

**Supplementary table 1. IL-1A, IL-1B, IL-1R1, IL-1Ra, and IL-1Racp genetic instrumental variants (IVs).**

| Exposure | SNP         | Beta   | SE    | EA | NEA | EAF  | p val    | Gene          |
|----------|-------------|--------|-------|----|-----|------|----------|---------------|
| IL-1A    | rs13170249  | 0.353  | 0.077 | T  | C   | 0.03 | 4.37E-06 | PAM           |
| IL-1A    | rs78084692  | 0.874  | 0.182 | G  | A   | 0.01 | 1.51E-06 | AC004540.5    |
| IL-1A    | rs7148359   | -0.135 | 0.029 | T  | C   | 0.27 | 2.14E-06 | AL445384.1    |
| IL-1A    | rs4867603   | -0.131 | 0.027 | C  | T   | 0.55 | 1.05E-06 | KCNIP1        |
| IL-1A    | rs10418046  | 0.153  | 0.030 | G  | T   | 0.22 | 3.09E-07 | NLRP12        |
| IL-1A    | rs6549977   | -0.120 | 0.026 | A  | G   | 0.38 | 3.89E-06 | AC137674.2    |
| IL-1A    | rs8107140   | 0.115  | 0.025 | A  | C   | 0.59 | 3.63E-06 | ZIM2          |
| IL-1A    | rs28895307  | 0.365  | 0.072 | G  | T   | 0.03 | 4.27E-07 | OTUD7A        |
| IL-1A    | rs60010354  | 0.114  | 0.025 | G  | A   | 0.42 | 4.17E-06 | DDX10         |
| IL-1A    | rs41386050  | 0.318  | 0.069 | T  | G   | 0.03 | 4.79E-06 | LIPG          |
| IL-1A    | rs2734376   | 0.140  | 0.028 | T  | C   | 0.69 | 4.90E-07 | FHIT          |
| IL-1A    | rs2749675   | -0.172 | 0.037 | G  | A   | 0.87 | 4.37E-06 | ZDHC14        |
| IL-1A    | rs77869959  | -0.240 | 0.052 | A  | C   | 0.06 | 4.47E-06 | RP11-313L9.1  |
| IL-1A    | rs6033085   | -0.180 | 0.039 | T  | A   | 0.89 | 4.90E-06 | RP4-734C18.1  |
| IL-1A    | rs72647025  | 0.134  | 0.028 | G  | C   | 0.39 | 1.86E-06 | VWA5B1        |
| IL-1A    | rs11922046  | 0.139  | 0.029 | T  | C   | 0.26 | 1.20E-06 | RN5S142       |
| IL-1A    | rs139711468 | -0.347 | 0.073 | A  | G   | 0.03 | 1.86E-06 | RP11-405A12.2 |
| IL-1A    | rs4757027   | -0.143 | 0.028 | C  | G   | 0.68 | 3.39E-07 | NAV2          |
| IL-1A    | rs192996211 | -0.469 | 0.103 | A  | G   | 0.02 | 4.90E-06 | RP11-428L9.1  |
| IL-1B    | rs115242021 | 0.233  | 0.041 | A  | C   | 0.09 | 5.07E-07 | U1            |
| IL-1B    | rs143319329 | 0.280  | 0.072 | T  | C   | 0.03 | 2.00E-06 | METTL2B       |
| IL-1B    | rs61335305  | 0.297  | 0.072 | A  | C   | 0.01 | 1.90E-06 | MEGF11        |
| IL-1B    | rs4786740   | 0.085  | 0.020 | A  | C   | 0.41 | 4.67E-06 | RP11-420N3.2  |
| IL-1B    | rs62015704  | 0.108  | 0.028 | A  | G   | 0.88 | 2.09E-06 | RBFOX1        |
| IL-1B    | rs9898641   | 0.203  | 0.045 | C  | T   | 0.1  | 3.59E-06 | RP11-567L7.6  |
| IL-1B    | rs1942793   | 0.072  | 0.019 | T  | G   | 0.47 | 4.98E-06 | CTD-2354A18.1 |
| IL-1R1   | rs1652049   | 0.128  | 0.027 | G  | T   | 0.46 | 1.62E-06 | RNASE11       |
| IL-1R1   | rs71358078  | -0.406 | 0.085 | T  | C   | 0.02 | 1.86E-06 | RP11-172F10.1 |
| IL-1R1   | rs112081515 | -0.286 | 0.062 | G  | A   | 0.04 | 3.55E-06 | DYM           |
| IL-1R1   | rs10208542  | -0.185 | 0.037 | C  | G   | 0.13 | 6.46E-07 | IL1R1         |
| IL-1R1   | rs77451959  | 0.400  | 0.086 | T  | G   | 0.02 | 2.95E-06 | MPPED2        |
| IL-1R1   | rs12493830  | -0.138 | 0.025 | C  | T   | 0.45 | 6.17E-08 | ST3GAL6-AS1   |
| IL-1R1   | rs76053345  | -0.756 | 0.157 | C  | T   | 0.01 | 1.38E-06 | EPB41L4B      |
| IL-1R1   | rs140225543 | -0.553 | 0.119 | A  | G   | 0.01 | 3.47E-06 | TMEM86B       |
| IL-1R1   | rs72771293  | 0.150  | 0.031 | G  | A   | 0.22 | 1.17E-06 | HAPLN1        |
| IL-1R1   | rs78801677  | 0.206  | 0.044 | A  | G   | 0.09 | 3.31E-06 | LRRTM3        |
| IL-1R1   | rs144792666 | 0.485  | 0.101 | T  | C   | 0.02 | 1.45E-06 | YIPF7         |
| IL-1R1   | rs35583440  | 0.874  | 0.191 | C  | G   | 0.01 | 4.79E-06 | RCN1          |
| IL-1R1   | rs11888059  | 0.115  | 0.025 | G  | A   | 0.5  | 3.02E-06 | IL1R1         |
| IL-1R1   | rs145533598 | 0.470  | 0.097 | A  | G   | 0.02 | 1.12E-06 | PPARG         |
| IL-1R1   | rs10424405  | -0.146 | 0.030 | G  | A   | 0.22 | 1.32E-06 | NLRP12        |
| IL-1R1   | rs55923630  | -0.149 | 0.026 | T  | A   | 0.3  | 1.35E-08 | IGSF11        |
| IL-1R1   | rs150889493 | -0.438 | 0.089 | C  | T   | 0.02 | 7.94E-07 | RP11-420N3.2  |
| IL-1R1   | rs4690014   | 0.133  | 0.026 | A  | G   | 0.39 | 2.69E-07 | RGS12         |
| IL-1R1   | rs143365592 | 0.568  | 0.124 | G  | T   | 0.01 | 4.79E-06 | KRTAP13-1     |
| IL-1R1   | rs10972130  | 0.147  | 0.031 | A  | G   | 0.2  | 2.29E-06 | DNAI1         |
| IL-1Ra   | rs12121840  | 0.269  | 0.057 | T  | C   | 0.08 | 2.43E-06 | RP11-280O1.2  |
| IL-1Ra   | rs56134659  | 0.112  | 0.024 | G  | A   | 0.4  | 2.44E-06 | H1FX-AS1      |
| IL-1Ra   | rs1054402   | 0.131  | 0.027 | T  | C   | 0.26 | 1.13E-06 | PAPPA         |
| IL-1Ra   | rs2809154   | 0.179  | 0.039 | C  | T   | 0.82 | 3.74E-06 | SLITRK1       |
| IL-1Ra   | rs11627423  | 0.117  | 0.025 | A  | C   | 0.61 | 2.12E-06 | AKAP6         |
| IL-1Ra   | rs61335305  | 0.445  | 0.091 | A  | C   | 0.01 | 1.00E-06 | MEGF11        |
| IL-1Ra   | rs11869294  | 0.227  | 0.047 | G  | C   | 0.03 | 1.50E-06 | CRHR1         |
| IL-1Ra   | rs147747784 | 0.365  | 0.076 | C  | G   | 0.02 | 1.46E-06 | LILRB1        |

|          |             |        |       |   |   |      |           |               |
|----------|-------------|--------|-------|---|---|------|-----------|---------------|
| IL-1Ra   | rs187166731 | 0.233  | 0.051 | C | T | 0.98 | 4.70E-06  | Z83851.3      |
| IL-1Ra   | rs9623661   | 0.197  | 0.043 | C | T | 0.91 | 3.86E-06  | A4GALT        |
| IL-1Racp | rs1988743   | 0.135  | 0.028 | C | G | 0.72 | 1.51E-06  | IL1RAP        |
| IL-1Racp | rs2885370   | -0.209 | 0.031 | T | G | 0.74 | 8.91E-12  | IL1RAP        |
| IL-1Racp | rs41268633  | -0.251 | 0.050 | G | A | 0.09 | 6.03E-07  | IL1RAP        |
| IL-1Racp | rs113553332 | 0.685  | 0.056 | T | C | 0.05 | 4.68E-34  | GMNC          |
| IL-1Racp | rs148996090 | 1.111  | 0.137 | A | C | 0.01 | 3.98E-16  | IL1RAP        |
| IL-1Racp | rs67249092  | -0.379 | 0.035 | G | A | 0.15 | 5.25E-28  | IL1RAP        |
| IL-1Racp | rs6444435   | -0.171 | 0.026 | G | A | 0.35 | 5.37E-11  | IL1RAP        |
| IL-1Racp | rs1024949   | -0.448 | 0.040 | C | T | 0.13 | 2.95E-29  | IL1RAP        |
| IL-1Racp | rs3935774   | 0.741  | 0.112 | T | C | 0.02 | 3.55E-11  | IL1RAP        |
| IL-1Racp | rs13084868  | 0.178  | 0.039 | C | T | 0.12 | 4.27E-06  | GMNC          |
| IL-1Racp | rs1607264   | -0.146 | 0.031 | C | A | 0.8  | 2.82E-06  | ZNF385B       |
| IL-1Racp | rs62196769  | -0.205 | 0.044 | C | A | 0.09 | 3.09E-06  | AC010983.1    |
| IL-1Racp | rs4815878   | 0.155  | 0.030 | A | G | 0.76 | 1.95E-07  | SRXN1         |
| IL-1Racp | rs6461953   | -0.146 | 0.032 | C | T | 0.18 | 4.68E-06  | AC073316.1    |
| IL-1Racp | rs4687154   | -0.581 | 0.040 | C | G | 0.89 | 7.94E-49  | IL1RAP        |
| IL-1Racp | rs6796131   | -0.244 | 0.026 | C | G | 0.33 | 1.51E-20  | IL1RAP        |
| IL-1Racp | rs4624606   | -0.925 | 0.025 | T | A | 0.75 | 1.00E-200 | IL1RAP        |
| IL-1Racp | rs6444430   | 0.154  | 0.033 | A | G | 0.79 | 2.29E-06  | IL1RAP        |
| IL-1Racp | rs16969649  | -0.140 | 0.031 | T | C | 0.21 | 4.90E-06  | MIR4318       |
| IL-1Racp | rs7623802   | -0.129 | 0.027 | T | C | 0.66 | 1.41E-06  | RP11-6B4.1    |
| IL-1Racp | rs62116908  | -0.294 | 0.064 | C | T | 0.04 | 3.72E-06  | AC022311.1    |
| IL-1Racp | rs61492644  | -0.124 | 0.025 | A | G | 0.52 | 7.41E-07  | GFOD1         |
| IL-1Racp | rs6801017   | -0.202 | 0.031 | G | A | 0.21 | 3.80E-11  | IL1RAP        |
| IL-1Racp | rs78129851  | 0.793  | 0.117 | A | G | 0.01 | 1.07E-11  | IL1RAP        |
| IL-1Racp | rs5753690   | 0.149  | 0.029 | T | C | 0.23 | 2.95E-07  | SFI1          |
| IL-1Racp | rs13059920  | 0.420  | 0.038 | G | A | 0.13 | 9.33E-29  | IL1RAP        |
| IL-1Racp | rs73754360  | 0.384  | 0.080 | G | T | 0.03 | 1.78E-06  | RP11-127B16.1 |
| IL-1Racp | rs75857200  | 0.199  | 0.042 | A | C | 0.1  | 2.34E-06  | CTD-2591A6.2  |

SNP: single-nucleotide polymorphism. EA: effect allele. NEA: non-effect allele. EAF: effect allele frequency. Beta: the regression coefficient based on the IL-1A, IL-1B, IL-1R1, IL-1Ra, or IL-1Racp raising effect allele. SE: standard error.

Supplementary table 2. Association of IL-1A, IL-1B, IL-1R1, IL-1Ra, and IL-1Racp genetic IVs in COVID-19 GWAS dataset.

| Exposure GWAS ID | SNP         | Exposure GWAS |          |              | Outcome (COVID-19) GWAS |       |              |
|------------------|-------------|---------------|----------|--------------|-------------------------|-------|--------------|
|                  |             | Beta          | SE       | <i>p</i> val | Beta                    | SE    | <i>p</i> val |
| ebi-a-GCST010775 | rs10418046  | 0.153         | 0.030    | 3.09E-07     | -0.114                  | 0.244 | 0.639        |
|                  | rs11922046  | 0.139         | 0.029    | 1.20E-06     | 0.114                   | 0.170 | 0.503        |
|                  | rs13170249  | 0.353         | 0.077    | 4.37E-06     | -0.043                  | 0.480 | 0.928        |
|                  | rs139711468 | -0.347        | 0.073    | 1.86E-06     | -0.790                  | 0.865 | 0.362        |
|                  | rs192996211 | -0.469        | 0.103    | 4.90E-06     | -0.414                  | 0.702 | 0.556        |
|                  | rs2734376   | 0.140         | 0.028    | 4.90E-07     | 0.006                   | 0.163 | 0.970        |
|                  | rs2749675   | -0.172        | 0.037    | 4.37E-06     | -0.614                  | 0.333 | 0.065        |
|                  | rs28895307  | 0.365         | 0.072    | 4.27E-07     | 0.167                   | 0.405 | 0.679        |
|                  | rs41386050  | 0.318         | 0.069    | 4.79E-06     | -0.475                  | 0.445 | 0.286        |
|                  | rs4757027   | -0.143        | 0.028    | 3.39E-07     | -0.049                  | 0.157 | 0.756        |
|                  | rs4867603   | -0.131        | 0.027    | 1.05E-06     | 0.125                   | 0.148 | 0.398        |
|                  | rs60010354  | 0.114         | 0.025    | 4.17E-06     | -0.191                  | 0.148 | 0.197        |
|                  | rs6033085   | -0.180        | 0.039    | 4.90E-06     | 0.223                   | 0.214 | 0.298        |
|                  | rs6549977   | -0.120        | 0.026    | 3.89E-06     | 0.019                   | 0.149 | 0.897        |
|                  | rs7148359   | -0.135        | 0.029    | 2.14E-06     | -0.097                  | 0.203 | 0.633        |
|                  | rs72647025  | 0.134         | 0.028    | 1.86E-06     | 0.036                   | 0.160 | 0.820        |
|                  | rs77869959  | -0.240        | 0.052    | 4.47E-06     | 1.317                   | 0.392 | 0.001        |
| rs8107140        | 0.115       | 0.025         | 3.63E-06 | -0.294       | 0.154                   | 0.056 |              |
| ebi-a-GCST010776 | rs10418046  | 0.153         | 0.030    | 3.09E-07     | 0.035                   | 0.022 | 0.110        |
|                  | rs11922046  | 0.139         | 0.029    | 1.20E-06     | -0.053                  | 0.018 | 0.003        |
|                  | rs13170249  | 0.353         | 0.077    | 4.37E-06     | -0.061                  | 0.044 | 0.170        |
|                  | rs139711468 | -0.347        | 0.073    | 1.86E-06     | 0.012                   | 0.046 | 0.802        |
|                  | rs192996211 | -0.469        | 0.103    | 4.90E-06     | 0.001                   | 0.075 | 0.985        |
|                  | rs2734376   | 0.140         | 0.028    | 4.90E-07     | 0.016                   | 0.017 | 0.329        |
|                  | rs2749675   | -0.172        | 0.037    | 4.37E-06     | -0.020                  | 0.031 | 0.510        |
|                  | rs28895307  | 0.365         | 0.072    | 4.27E-07     | -0.035                  | 0.049 | 0.473        |
|                  | rs41386050  | 0.318         | 0.069    | 4.79E-06     | -0.010                  | 0.040 | 0.795        |
|                  | rs4757027   | -0.143        | 0.028    | 3.39E-07     | -0.013                  | 0.018 | 0.462        |
|                  | rs4867603   | -0.131        | 0.027    | 1.05E-06     | -0.011                  | 0.017 | 0.536        |
|                  | rs60010354  | 0.114         | 0.025    | 4.17E-06     | 0.010                   | 0.015 | 0.494        |
|                  | rs6033085   | -0.180        | 0.039    | 4.90E-06     | 0.066                   | 0.024 | 0.006        |
|                  | rs6549977   | -0.120        | 0.026    | 3.89E-06     | -0.022                  | 0.017 | 0.204        |
|                  | rs7148359   | -0.135        | 0.029    | 2.14E-06     | -0.035                  | 0.021 | 0.093        |
|                  | rs72647025  | 0.134         | 0.028    | 1.86E-06     | 0.012                   | 0.018 | 0.493        |
|                  | rs77869959  | -0.240        | 0.052    | 4.47E-06     | -0.023                  | 0.037 | 0.530        |
| rs78084692       | 0.874       | 0.182         | 1.51E-06 | -0.052       | 0.138                   | 0.704 |              |
| rs8107140        | 0.115       | 0.025         | 3.63E-06 | 0.002        | 0.016                   | 0.920 |              |
| ebi-a-GCST010777 | rs10418046  | 0.153         | 0.030    | 3.09E-07     | 0.018                   | 0.020 | 0.349        |
|                  | rs11922046  | 0.139         | 0.029    | 1.20E-06     | -0.044                  | 0.019 | 0.022        |
|                  | rs13170249  | 0.353         | 0.077    | 4.37E-06     | -0.095                  | 0.049 | 0.053        |
|                  | rs139711468 | -0.347        | 0.073    | 1.86E-06     | 0.053                   | 0.052 | 0.310        |
|                  | rs192996211 | -0.469        | 0.103    | 4.90E-06     | 0.053                   | 0.086 | 0.539        |
|                  | rs2734376   | 0.140         | 0.028    | 4.90E-07     | 0.028                   | 0.018 | 0.124        |
|                  | rs2749675   | -0.172        | 0.037    | 4.37E-06     | -0.007                  | 0.032 | 0.826        |
|                  | rs28895307  | 0.365         | 0.072    | 4.27E-07     | -0.069                  | 0.059 | 0.243        |
|                  | rs41386050  | 0.318         | 0.069    | 4.79E-06     | 0.013                   | 0.047 | 0.786        |
|                  | rs4757027   | -0.143        | 0.028    | 3.39E-07     | -0.014                  | 0.018 | 0.452        |
|                  | rs4867603   | -0.131        | 0.027    | 1.05E-06     | -0.023                  | 0.019 | 0.222        |
|                  | rs60010354  | 0.114         | 0.025    | 4.17E-06     | 0.018                   | 0.016 | 0.265        |
|                  | rs6033085   | -0.180        | 0.039    | 4.90E-06     | 0.043                   | 0.024 | 0.072        |
|                  | rs6549977   | -0.120        | 0.026    | 3.89E-06     | 0.007                   | 0.019 | 0.724        |

|  |                  |             |        |       |          |        |       |       |
|--|------------------|-------------|--------|-------|----------|--------|-------|-------|
|  |                  | rs7148359   | -0.135 | 0.029 | 2.14E-06 | -0.017 | 0.023 | 0.476 |
|  |                  | rs72647025  | 0.134  | 0.028 | 1.86E-06 | 0.016  | 0.020 | 0.421 |
|  |                  | rs77869959  | -0.240 | 0.052 | 4.47E-06 | 0.012  | 0.040 | 0.758 |
|  |                  | rs78084692  | 0.874  | 0.182 | 1.51E-06 | -0.032 | 0.197 | 0.873 |
|  |                  | rs8107140   | 0.115  | 0.025 | 3.63E-06 | 0.014  | 0.016 | 0.388 |
|  |                  | rs10418046  | 0.153  | 0.030 | 3.09E-07 | 0.018  | 0.020 | 0.349 |
|  |                  | rs11922046  | 0.139  | 0.029 | 1.20E-06 | -0.044 | 0.019 | 0.022 |
|  |                  | rs13170249  | 0.353  | 0.077 | 4.37E-06 | -0.095 | 0.049 | 0.053 |
|  |                  | rs139711468 | -0.347 | 0.073 | 1.86E-06 | 0.053  | 0.052 | 0.310 |
|  |                  | rs192996211 | -0.469 | 0.103 | 4.90E-06 | 0.053  | 0.086 | 0.539 |
|  |                  | rs2734376   | 0.140  | 0.028 | 4.90E-07 | 0.028  | 0.018 | 0.124 |
|  |                  | rs2749675   | -0.172 | 0.037 | 4.37E-06 | -0.007 | 0.032 | 0.826 |
|  |                  | rs28895307  | 0.365  | 0.072 | 4.27E-07 | -0.069 | 0.059 | 0.243 |
|  |                  | rs41386050  | 0.318  | 0.069 | 4.79E-06 | 0.013  | 0.047 | 0.786 |
|  | ebi-a-GCST010778 | rs4757027   | -0.143 | 0.028 | 3.39E-07 | -0.014 | 0.018 | 0.452 |
|  |                  | rs4867603   | -0.131 | 0.027 | 1.05E-06 | -0.023 | 0.019 | 0.222 |
|  |                  | rs60010354  | 0.114  | 0.025 | 4.17E-06 | 0.018  | 0.016 | 0.265 |
|  |                  | rs6033085   | -0.180 | 0.039 | 4.90E-06 | 0.043  | 0.024 | 0.072 |
|  |                  | rs6549977   | -0.120 | 0.026 | 3.89E-06 | 0.007  | 0.019 | 0.724 |
|  |                  | rs7148359   | -0.135 | 0.029 | 2.14E-06 | -0.017 | 0.023 | 0.476 |
|  |                  | rs72647025  | 0.134  | 0.028 | 1.86E-06 | 0.016  | 0.020 | 0.421 |
|  |                  | rs77869959  | -0.240 | 0.052 | 4.47E-06 | 0.012  | 0.040 | 0.758 |
|  |                  | rs78084692  | 0.874  | 0.182 | 1.51E-06 | -0.032 | 0.197 | 0.873 |
|  |                  | rs8107140   | 0.115  | 0.025 | 3.63E-06 | 0.014  | 0.016 | 0.388 |
|  |                  | rs10418046  | 0.153  | 0.030 | 3.09E-07 | 0.040  | 0.031 | 0.202 |
|  |                  | rs11922046  | 0.139  | 0.029 | 1.20E-06 | -0.078 | 0.029 | 0.007 |
|  |                  | rs13170249  | 0.353  | 0.077 | 4.37E-06 | -0.007 | 0.064 | 0.913 |
|  |                  | rs139711468 | -0.347 | 0.073 | 1.86E-06 | 0.008  | 0.076 | 0.917 |
|  |                  | rs192996211 | -0.469 | 0.103 | 4.90E-06 | 0.088  | 0.112 | 0.432 |
|  |                  | rs2734376   | 0.140  | 0.028 | 4.90E-07 | 0.018  | 0.023 | 0.430 |
|  |                  | rs2749675   | -0.172 | 0.037 | 4.37E-06 | -0.010 | 0.039 | 0.798 |
|  |                  | rs28895307  | 0.365  | 0.072 | 4.27E-07 | 0.065  | 0.074 | 0.380 |
|  |                  | rs41386050  | 0.318  | 0.069 | 4.79E-06 | -0.129 | 0.066 | 0.050 |
|  | ebi-a-GCST010779 | rs4757027   | -0.143 | 0.028 | 3.39E-07 | -0.025 | 0.027 | 0.358 |
|  |                  | rs4867603   | -0.131 | 0.027 | 1.05E-06 | -0.007 | 0.028 | 0.802 |
|  |                  | rs60010354  | 0.114  | 0.025 | 4.17E-06 | 0.020  | 0.021 | 0.354 |
|  |                  | rs6033085   | -0.180 | 0.039 | 4.90E-06 | 0.054  | 0.038 | 0.158 |
|  |                  | rs6549977   | -0.120 | 0.026 | 3.89E-06 | -0.047 | 0.027 | 0.085 |
|  |                  | rs7148359   | -0.135 | 0.029 | 2.14E-06 | -0.033 | 0.030 | 0.270 |
|  |                  | rs72647025  | 0.134  | 0.028 | 1.86E-06 | -0.021 | 0.029 | 0.479 |
|  |                  | rs77869959  | -0.240 | 0.052 | 4.47E-06 | 0.036  | 0.059 | 0.550 |
|  |                  | rs78084692  | 0.874  | 0.182 | 1.51E-06 | -0.046 | 0.174 | 0.793 |
|  |                  | rs8107140   | 0.115  | 0.025 | 3.63E-06 | -0.015 | 0.024 | 0.518 |
|  |                  | rs10418046  | 0.153  | 0.030 | 3.09E-07 | 0.026  | 0.018 | 0.139 |
|  |                  | rs11922046  | 0.139  | 0.029 | 1.20E-06 | -0.055 | 0.016 | 0.001 |
|  |                  | rs13170249  | 0.353  | 0.077 | 4.37E-06 | -0.024 | 0.040 | 0.545 |
|  |                  | rs139711468 | -0.347 | 0.073 | 1.86E-06 | 0.025  | 0.045 | 0.585 |
|  |                  | rs192996211 | -0.469 | 0.103 | 4.90E-06 | 0.012  | 0.065 | 0.859 |
|  |                  | rs2734376   | 0.140  | 0.028 | 4.90E-07 | 0.023  | 0.014 | 0.104 |
|  |                  | rs2749675   | -0.172 | 0.037 | 4.37E-06 | -0.012 | 0.026 | 0.638 |
|  |                  | rs28895307  | 0.365  | 0.072 | 4.27E-07 | -0.020 | 0.048 | 0.671 |
|  |                  | rs41386050  | 0.318  | 0.069 | 4.79E-06 | -0.012 | 0.039 | 0.754 |
|  | ebi-a-GCST010780 | rs4757027   | -0.143 | 0.028 | 3.39E-07 | -0.012 | 0.015 | 0.439 |
|  |                  | rs4867603   | -0.131 | 0.027 | 1.05E-06 | -0.026 | 0.016 | 0.091 |
|  |                  | rs60010354  | 0.114  | 0.025 | 4.17E-06 | 0.012  | 0.013 | 0.354 |
|  |                  | rs6033085   | -0.180 | 0.039 | 4.90E-06 | 0.054  | 0.021 | 0.009 |
|  |                  | rs6549977   | -0.120 | 0.026 | 3.89E-06 | -0.014 | 0.015 | 0.375 |
|  |                  | rs7148359   | -0.135 | 0.029 | 2.14E-06 | -0.023 | 0.018 | 0.210 |



|                  |             |        |       |          |        |       |       |
|------------------|-------------|--------|-------|----------|--------|-------|-------|
|                  | rs72647025  | 0.134  | 0.028 | 1.86E-06 | -0.001 | 0.017 | 0.940 |
|                  | rs77869959  | -0.240 | 0.052 | 4.47E-06 | -0.019 | 0.033 | 0.572 |
|                  | rs78084692  | 0.874  | 0.182 | 1.51E-06 | 0.046  | 0.127 | 0.714 |
|                  | rs8107140   | 0.115  | 0.025 | 3.63E-06 | 0.002  | 0.013 | 0.886 |
|                  | rs10418046  | 0.153  | 0.030 | 3.09E-07 | -0.001 | 0.039 | 0.979 |
|                  | rs11922046  | 0.139  | 0.029 | 1.20E-06 | -0.017 | 0.031 | 0.586 |
|                  | rs13170249  | 0.353  | 0.077 | 4.37E-06 | 0.080  | 0.080 | 0.321 |
|                  | rs139711468 | -0.347 | 0.073 | 1.86E-06 | 0.090  | 0.087 | 0.301 |
|                  | rs192996211 | -0.469 | 0.103 | 4.90E-06 | -0.138 | 0.156 | 0.375 |
|                  | rs2734376   | 0.140  | 0.028 | 4.90E-07 | 0.027  | 0.030 | 0.358 |
|                  | rs2749675   | -0.172 | 0.037 | 4.37E-06 | 0.075  | 0.044 | 0.088 |
|                  | rs28895307  | 0.365  | 0.072 | 4.27E-07 | 0.039  | 0.088 | 0.656 |
|                  | rs41386050  | 0.318  | 0.069 | 4.79E-06 | -0.068 | 0.071 | 0.343 |
| ebi-a-GCST010781 | rs4757027   | -0.143 | 0.028 | 3.39E-07 | 0.033  | 0.033 | 0.321 |
|                  | rs4867603   | -0.131 | 0.027 | 1.05E-06 | -0.043 | 0.030 | 0.151 |
|                  | rs60010354  | 0.114  | 0.025 | 4.17E-06 | -0.034 | 0.030 | 0.265 |
|                  | rs6033085   | -0.180 | 0.039 | 4.90E-06 | -0.006 | 0.044 | 0.891 |
|                  | rs6549977   | -0.120 | 0.026 | 3.89E-06 | -0.016 | 0.028 | 0.574 |
|                  | rs7148359   | -0.135 | 0.029 | 2.14E-06 | 0.012  | 0.031 | 0.687 |
|                  | rs72647025  | 0.134  | 0.028 | 1.86E-06 | 0.026  | 0.029 | 0.361 |
|                  | rs77869959  | -0.240 | 0.052 | 4.47E-06 | 0.012  | 0.069 | 0.857 |
|                  | rs78084692  | 0.874  | 0.182 | 1.51E-06 | -0.350 | 0.258 | 0.175 |
|                  | rs8107140   | 0.115  | 0.025 | 3.63E-06 | 0.001  | 0.027 | 0.971 |
|                  | rs10418046  | 0.153  | 0.030 | 3.09E-07 | 0.037  | 0.049 | 0.449 |
|                  | rs11922046  | 0.139  | 0.029 | 1.20E-06 | -0.030 | 0.050 | 0.546 |
|                  | rs13170249  | 0.353  | 0.077 | 4.37E-06 | -0.139 | 0.133 | 0.298 |
|                  | rs139711468 | -0.347 | 0.073 | 1.86E-06 | 0.166  | 0.142 | 0.243 |
|                  | rs192996211 | -0.469 | 0.103 | 4.90E-06 | 0.186  | 0.221 | 0.400 |
|                  | rs2734376   | 0.140  | 0.028 | 4.90E-07 | -0.015 | 0.047 | 0.757 |
|                  | rs2749675   | -0.172 | 0.037 | 4.37E-06 | 0.131  | 0.077 | 0.091 |
|                  | rs28895307  | 0.365  | 0.072 | 4.27E-07 | -0.191 | 0.159 | 0.232 |
|                  | rs41386050  | 0.318  | 0.069 | 4.79E-06 | -0.345 | 0.138 | 0.012 |
| ebi-a-GCST010782 | rs4757027   | -0.143 | 0.028 | 3.39E-07 | 0.032  | 0.047 | 0.493 |
|                  | rs4867603   | -0.131 | 0.027 | 1.05E-06 | -0.011 | 0.052 | 0.838 |
|                  | rs60010354  | 0.114  | 0.025 | 4.17E-06 | 0.062  | 0.052 | 0.236 |
|                  | rs6033085   | -0.180 | 0.039 | 4.90E-06 | -0.036 | 0.060 | 0.553 |
|                  | rs6549977   | -0.120 | 0.026 | 3.89E-06 | -0.039 | 0.054 | 0.464 |
|                  | rs7148359   | -0.135 | 0.029 | 2.14E-06 | -0.036 | 0.062 | 0.563 |
|                  | rs72647025  | 0.134  | 0.028 | 1.86E-06 | 0.006  | 0.056 | 0.914 |
|                  | rs77869959  | -0.240 | 0.052 | 4.47E-06 | 0.152  | 0.102 | 0.136 |
|                  | rs78084692  | 0.874  | 0.182 | 1.51E-06 | 0.160  | 0.551 | 0.772 |
|                  | rs8107140   | 0.115  | 0.025 | 3.63E-06 | -0.051 | 0.041 | 0.212 |
|                  | rs10418046  | 0.153  | 0.030 | 3.09E-07 | -0.078 | 0.053 | 0.139 |
|                  | rs11922046  | 0.139  | 0.029 | 1.20E-06 | -0.091 | 0.043 | 0.036 |
|                  | rs13170249  | 0.353  | 0.077 | 4.37E-06 | 0.117  | 0.083 | 0.162 |
|                  | rs139711468 | -0.347 | 0.073 | 1.86E-06 | 0.052  | 0.095 | 0.584 |
|                  | rs192996211 | -0.469 | 0.103 | 4.90E-06 | 0.272  | 0.150 | 0.070 |
|                  | rs2734376   | 0.140  | 0.028 | 4.90E-07 | -0.001 | 0.030 | 0.981 |
|                  | rs2749675   | -0.172 | 0.037 | 4.37E-06 | -0.039 | 0.056 | 0.481 |
|                  | rs28895307  | 0.365  | 0.072 | 4.27E-07 | -0.013 | 0.091 | 0.889 |
|                  | rs41386050  | 0.318  | 0.069 | 4.79E-06 | -0.185 | 0.083 | 0.025 |
| ebi-a-GCST010783 | rs4757027   | -0.143 | 0.028 | 3.39E-07 | -0.037 | 0.041 | 0.374 |
|                  | rs4867603   | -0.131 | 0.027 | 1.05E-06 | -0.011 | 0.039 | 0.787 |
|                  | rs60010354  | 0.114  | 0.025 | 4.17E-06 | 0.017  | 0.028 | 0.543 |
|                  | rs6033085   | -0.180 | 0.039 | 4.90E-06 | 0.056  | 0.060 | 0.349 |
|                  | rs6549977   | -0.120 | 0.026 | 3.89E-06 | -0.060 | 0.038 | 0.117 |
|                  | rs7148359   | -0.135 | 0.029 | 2.14E-06 | 0.014  | 0.040 | 0.737 |
|                  | rs72647025  | 0.134  | 0.028 | 1.86E-06 | -0.001 | 0.041 | 0.989 |

|                        |             |        |       |          |        |       |       |
|------------------------|-------------|--------|-------|----------|--------|-------|-------|
|                        | rs77869959  | -0.240 | 0.052 | 4.47E-06 | -0.028 | 0.089 | 0.754 |
|                        | rs78084692  | 0.874  | 0.182 | 1.51E-06 | 0.095  | 0.213 | 0.657 |
|                        | rs8107140   | 0.115  | 0.025 | 3.63E-06 | 0.018  | 0.037 | 0.629 |
|                        | rs143319329 | 0.280  | 0.072 | 2.00E-06 | -1.066 | 0.437 | 0.015 |
|                        | rs1942793   | 0.072  | 0.019 | 4.98E-06 | -0.190 | 0.158 | 0.230 |
| ebi-a-GCST010775       | rs4786740   | 0.085  | 0.020 | 4.67E-06 | 0.007  | 0.160 | 0.964 |
|                        | rs61335305  | 0.297  | 0.072 | 1.90E-06 | -0.369 | 0.451 | 0.413 |
|                        | rs62015704  | 0.108  | 0.028 | 2.09E-06 | -0.264 | 0.232 | 0.255 |
|                        | rs9898641   | 0.203  | 0.045 | 3.59E-06 | 0.032  | 0.237 | 0.891 |
|                        | rs143319329 | 0.280  | 0.072 | 2.00E-06 | 0.002  | 0.048 | 0.960 |
|                        | rs1942793   | 0.072  | 0.019 | 4.98E-06 | -0.013 | 0.014 | 0.382 |
| ebi-a-GCST010776       | rs4786740   | 0.085  | 0.020 | 4.67E-06 | -0.005 | 0.016 | 0.767 |
|                        | rs61335305  | 0.297  | 0.072 | 1.90E-06 | 0.059  | 0.060 | 0.332 |
|                        | rs62015704  | 0.108  | 0.028 | 2.09E-06 | -0.004 | 0.022 | 0.863 |
|                        | rs9898641   | 0.203  | 0.045 | 3.59E-06 | -0.023 | 0.021 | 0.271 |
|                        | rs143319329 | 0.280  | 0.072 | 2.00E-06 | 0.055  | 0.048 | 0.252 |
|                        | rs1942793   | 0.072  | 0.019 | 4.98E-06 | 0.009  | 0.015 | 0.555 |
| ebi-a-GCST010777       | rs4786740   | 0.085  | 0.020 | 4.67E-06 | 0.011  | 0.017 | 0.537 |
|                        | rs61335305  | 0.297  | 0.072 | 1.90E-06 | 0.028  | 0.042 | 0.504 |
|                        | rs62015704  | 0.108  | 0.028 | 2.09E-06 | -0.025 | 0.024 | 0.304 |
|                        | rs9898641   | 0.203  | 0.045 | 3.59E-06 | 0.012  | 0.022 | 0.595 |
|                        | rs143319329 | 0.280  | 0.072 | 2.00E-06 | 0.055  | 0.048 | 0.252 |
|                        | rs1942793   | 0.072  | 0.019 | 4.98E-06 | 0.009  | 0.015 | 0.555 |
| ebi-a-GCST010778       | rs4786740   | 0.085  | 0.020 | 4.67E-06 | 0.011  | 0.017 | 0.537 |
|                        | rs61335305  | 0.297  | 0.072 | 1.90E-06 | 0.028  | 0.042 | 0.504 |
|                        | rs62015704  | 0.108  | 0.028 | 2.09E-06 | -0.025 | 0.024 | 0.304 |
|                        | rs9898641   | 0.203  | 0.045 | 3.59E-06 | 0.012  | 0.022 | 0.595 |
|                        | rs143319329 | 0.280  | 0.072 | 2.00E-06 | 0.087  | 0.065 | 0.180 |
|                        | rs1942793   | 0.072  | 0.019 | 4.98E-06 | -0.039 | 0.021 | 0.062 |
| IL-1B ebi-a-GCST010779 | rs4786740   | 0.085  | 0.020 | 4.67E-06 | -0.018 | 0.026 | 0.493 |
|                        | rs61335305  | 0.297  | 0.072 | 1.90E-06 | 0.074  | 0.067 | 0.268 |
|                        | rs62015704  | 0.108  | 0.028 | 2.09E-06 | 0.045  | 0.032 | 0.158 |
|                        | rs9898641   | 0.203  | 0.045 | 3.59E-06 | 0.024  | 0.037 | 0.521 |
|                        | rs143319329 | 0.280  | 0.072 | 2.00E-06 | 0.039  | 0.038 | 0.305 |
|                        | rs1942793   | 0.072  | 0.019 | 4.98E-06 | -0.019 | 0.013 | 0.134 |
| ebi-a-GCST010780       | rs4786740   | 0.085  | 0.020 | 4.67E-06 | 0.001  | 0.015 | 0.941 |
|                        | rs61335305  | 0.297  | 0.072 | 1.90E-06 | 0.017  | 0.038 | 0.653 |
|                        | rs62015704  | 0.108  | 0.028 | 2.09E-06 | 0.010  | 0.019 | 0.608 |
|                        | rs9898641   | 0.203  | 0.045 | 3.59E-06 | 0.003  | 0.020 | 0.894 |
|                        | rs143319329 | 0.280  | 0.072 | 2.00E-06 | 0.036  | 0.093 | 0.698 |
|                        | rs1942793   | 0.072  | 0.019 | 4.98E-06 | -0.022 | 0.026 | 0.407 |
| ebi-a-GCST010781       | rs4786740   | 0.085  | 0.020 | 4.67E-06 | -0.021 | 0.031 | 0.495 |
|                        | rs61335305  | 0.297  | 0.072 | 1.90E-06 | 0.124  | 0.170 | 0.466 |
|                        | rs62015704  | 0.108  | 0.028 | 2.09E-06 | 0.010  | 0.044 | 0.816 |
|                        | rs9898641   | 0.203  | 0.045 | 3.59E-06 | -0.049 | 0.028 | 0.087 |
|                        | rs143319329 | 0.280  | 0.072 | 2.00E-06 | -0.099 | 0.116 | 0.391 |
|                        | rs1942793   | 0.072  | 0.019 | 4.98E-06 | -0.015 | 0.040 | 0.707 |
| ebi-a-GCST010782       | rs4786740   | 0.085  | 0.020 | 4.67E-06 | -0.094 | 0.044 | 0.033 |
|                        | rs61335305  | 0.297  | 0.072 | 1.90E-06 | -0.037 | 0.101 | 0.715 |
|                        | rs62015704  | 0.108  | 0.028 | 2.09E-06 | 0.009  | 0.062 | 0.888 |
|                        | rs9898641   | 0.203  | 0.045 | 3.59E-06 | 0.047  | 0.050 | 0.343 |
|                        | rs143319329 | 0.280  | 0.072 | 2.00E-06 | 0.028  | 0.101 | 0.784 |
|                        | rs1942793   | 0.072  | 0.019 | 4.98E-06 | -0.032 | 0.027 | 0.243 |
| ebi-a-GCST010783       | rs4786740   | 0.085  | 0.020 | 4.67E-06 | -0.012 | 0.040 | 0.756 |
|                        | rs61335305  | 0.297  | 0.072 | 1.90E-06 | 0.114  | 0.114 | 0.319 |
|                        | rs62015704  | 0.108  | 0.028 | 2.09E-06 | 0.054  | 0.042 | 0.202 |
|                        | rs9898641   | 0.203  | 0.045 | 3.59E-06 | -0.036 | 0.038 | 0.343 |
|                        | rs10208542  | -0.185 | 0.037 | 6.46E-07 | -0.095 | 0.229 | 0.678 |

|                  |             |        |       |          |        |       |       |
|------------------|-------------|--------|-------|----------|--------|-------|-------|
|                  | rs10424405  | -0.146 | 0.030 | 1.32E-06 | -0.135 | 0.236 | 0.567 |
|                  | rs10972130  | 0.147  | 0.031 | 2.29E-06 | -0.085 | 0.180 | 0.638 |
|                  | rs112081515 | -0.286 | 0.062 | 3.55E-06 | -0.371 | 0.366 | 0.311 |
|                  | rs11888059  | 0.115  | 0.025 | 3.02E-06 | -0.115 | 0.152 | 0.450 |
|                  | rs12493830  | -0.138 | 0.025 | 6.17E-08 | 0.166  | 0.162 | 0.305 |
|                  | rs140225543 | -0.553 | 0.119 | 3.47E-06 | 0.942  | 1.019 | 0.355 |
|                  | rs144792666 | 0.485  | 0.101 | 1.45E-06 | -0.443 | 0.817 | 0.588 |
| ebi-a-GCST010775 | rs145533598 | 0.470  | 0.097 | 1.12E-06 | 0.172  | 0.614 | 0.780 |
|                  | rs150889493 | -0.438 | 0.089 | 7.94E-07 | 0.437  | 0.448 | 0.329 |
|                  | rs1652049   | 0.128  | 0.027 | 1.62E-06 | 0.140  | 0.152 | 0.357 |
|                  | rs35583440  | 0.874  | 0.191 | 4.79E-06 | -0.337 | 0.945 | 0.721 |
|                  | rs4690014   | 0.133  | 0.026 | 2.69E-07 | 0.167  | 0.158 | 0.289 |
|                  | rs55923630  | -0.149 | 0.026 | 1.35E-08 | -0.017 | 0.171 | 0.922 |
|                  | rs71358078  | -0.406 | 0.085 | 1.86E-06 | 0.001  | 0.746 | 0.999 |
|                  | rs72771293  | 0.150  | 0.031 | 1.17E-06 | 0.046  | 0.172 | 0.787 |
|                  | rs77451959  | 0.400  | 0.086 | 2.95E-06 | 0.546  | 0.502 | 0.277 |
|                  | rs78801677  | 0.206  | 0.044 | 3.31E-06 | 0.023  | 0.302 | 0.940 |
|                  | rs10208542  | -0.185 | 0.037 | 6.46E-07 | -0.003 | 0.022 | 0.899 |
|                  | rs10424405  | -0.146 | 0.030 | 1.32E-06 | 0.025  | 0.022 | 0.263 |
|                  | rs10972130  | 0.147  | 0.031 | 2.29E-06 | 0.027  | 0.018 | 0.135 |
|                  | rs112081515 | -0.286 | 0.062 | 3.55E-06 | 0.054  | 0.036 | 0.132 |
|                  | rs11888059  | 0.115  | 0.025 | 3.02E-06 | 0.005  | 0.015 | 0.766 |
|                  | rs12493830  | -0.138 | 0.025 | 6.17E-08 | -0.013 | 0.014 | 0.371 |
|                  | rs140225543 | -0.553 | 0.119 | 3.47E-06 | 0.009  | 0.089 | 0.918 |
|                  | rs143365592 | 0.568  | 0.124 | 4.79E-06 | -0.150 | 0.087 | 0.086 |
|                  | rs144792666 | 0.485  | 0.101 | 1.45E-06 | -0.010 | 0.064 | 0.879 |
| ebi-a-GCST010776 | rs145533598 | 0.470  | 0.097 | 1.12E-06 | -0.013 | 0.059 | 0.819 |
|                  | rs150889493 | -0.438 | 0.089 | 7.94E-07 | 0.090  | 0.053 | 0.093 |
|                  | rs1652049   | 0.128  | 0.027 | 1.62E-06 | -0.003 | 0.016 | 0.830 |
|                  | rs35583440  | 0.874  | 0.191 | 4.79E-06 | -0.121 | 0.108 | 0.263 |
|                  | rs4690014   | 0.133  | 0.026 | 2.69E-07 | 0.011  | 0.016 | 0.490 |
|                  | rs55923630  | -0.149 | 0.026 | 1.35E-08 | 0.013  | 0.016 | 0.406 |
|                  | rs71358078  | -0.406 | 0.085 | 1.86E-06 | -0.006 | 0.053 | 0.908 |
|                  | rs72771293  | 0.150  | 0.031 | 1.17E-06 | -0.014 | 0.018 | 0.415 |
|                  | rs76053345  | -0.756 | 0.157 | 1.38E-06 | -0.078 | 0.112 | 0.489 |
|                  | rs77451959  | 0.400  | 0.086 | 2.95E-06 | -0.071 | 0.052 | 0.174 |
|                  | rs78801677  | 0.206  | 0.044 | 3.31E-06 | -0.010 | 0.030 | 0.751 |
|                  | rs10208542  | -0.185 | 0.037 | 6.46E-07 | -0.001 | 0.021 | 0.954 |
|                  | rs10424405  | -0.146 | 0.030 | 1.32E-06 | 0.017  | 0.020 | 0.399 |
|                  | rs10972130  | 0.147  | 0.031 | 2.29E-06 | 0.029  | 0.020 | 0.152 |
|                  | rs112081515 | -0.286 | 0.062 | 3.55E-06 | 0.034  | 0.042 | 0.419 |
|                  | rs11888059  | 0.115  | 0.025 | 3.02E-06 | -0.002 | 0.016 | 0.884 |
|                  | rs12493830  | -0.138 | 0.025 | 6.17E-08 | 0.002  | 0.016 | 0.922 |
|                  | rs140225543 | -0.553 | 0.119 | 3.47E-06 | -0.019 | 0.097 | 0.848 |
|                  | rs143365592 | 0.568  | 0.124 | 4.79E-06 | -0.096 | 0.092 | 0.298 |
|                  | rs144792666 | 0.485  | 0.101 | 1.45E-06 | 0.019  | 0.076 | 0.805 |
|                  | rs145533598 | 0.470  | 0.097 | 1.12E-06 | -0.092 | 0.072 | 0.201 |
| ebi-a-GCST010777 | rs150889493 | -0.438 | 0.089 | 7.94E-07 | 0.054  | 0.059 | 0.359 |
|                  | rs1652049   | 0.128  | 0.027 | 1.62E-06 | -0.005 | 0.016 | 0.759 |
|                  | rs35583440  | 0.874  | 0.191 | 4.79E-06 | -0.187 | 0.124 | 0.133 |
|                  | rs4690014   | 0.133  | 0.026 | 2.69E-07 | 0.018  | 0.017 | 0.285 |
|                  | rs55923630  | -0.149 | 0.026 | 1.35E-08 | 0.023  | 0.018 | 0.190 |
|                  | rs71358078  | -0.406 | 0.085 | 1.86E-06 | -0.018 | 0.061 | 0.774 |
|                  | rs72771293  | 0.150  | 0.031 | 1.17E-06 | -0.007 | 0.020 | 0.748 |
|                  | rs76053345  | -0.756 | 0.157 | 1.38E-06 | -0.133 | 0.116 | 0.252 |
|                  | rs77451959  | 0.400  | 0.086 | 2.95E-06 | -0.095 | 0.058 | 0.101 |
|                  | rs78801677  | 0.206  | 0.044 | 3.31E-06 | -0.031 | 0.033 | 0.349 |
|                  | rs10208542  | -0.185 | 0.037 | 6.46E-07 | -0.001 | 0.021 | 0.954 |

|                  |             |        |       |          |        |       |       |
|------------------|-------------|--------|-------|----------|--------|-------|-------|
|                  | rs10424405  | -0.146 | 0.030 | 1.32E-06 | 0.017  | 0.020 | 0.399 |
|                  | rs10972130  | 0.147  | 0.031 | 2.29E-06 | 0.029  | 0.020 | 0.152 |
|                  | rs112081515 | -0.286 | 0.062 | 3.55E-06 | 0.034  | 0.042 | 0.419 |
|                  | rs11888059  | 0.115  | 0.025 | 3.02E-06 | -0.002 | 0.016 | 0.884 |
|                  | rs12493830  | -0.138 | 0.025 | 6.17E-08 | 0.002  | 0.016 | 0.922 |
|                  | rs140225543 | -0.553 | 0.119 | 3.47E-06 | -0.019 | 0.097 | 0.848 |
|                  | rs143365592 | 0.568  | 0.124 | 4.79E-06 | -0.096 | 0.092 | 0.298 |
|                  | rs144792666 | 0.485  | 0.101 | 1.45E-06 | 0.019  | 0.076 | 0.805 |
| ebi-a-GCST010778 | rs145533598 | 0.470  | 0.097 | 1.12E-06 | -0.092 | 0.072 | 0.201 |
|                  | rs150889493 | -0.438 | 0.089 | 7.94E-07 | 0.054  | 0.059 | 0.359 |
|                  | rs1652049   | 0.128  | 0.027 | 1.62E-06 | -0.005 | 0.016 | 0.759 |
|                  | rs35583440  | 0.874  | 0.191 | 4.79E-06 | -0.187 | 0.124 | 0.133 |
|                  | rs4690014   | 0.133  | 0.026 | 2.69E-07 | 0.018  | 0.017 | 0.285 |
|                  | rs55923630  | -0.149 | 0.026 | 1.35E-08 | 0.023  | 0.018 | 0.190 |
|                  | rs71358078  | -0.406 | 0.085 | 1.86E-06 | -0.018 | 0.061 | 0.774 |
|                  | rs72771293  | 0.150  | 0.031 | 1.17E-06 | -0.007 | 0.020 | 0.748 |
|                  | rs76053345  | -0.756 | 0.157 | 1.38E-06 | -0.133 | 0.116 | 0.252 |
|                  | rs77451959  | 0.400  | 0.086 | 2.95E-06 | -0.095 | 0.058 | 0.101 |
|                  | rs78801677  | 0.206  | 0.044 | 3.31E-06 | -0.031 | 0.033 | 0.349 |
| <hr/>            |             |        |       |          |        |       |       |
|                  | rs10208542  | -0.185 | 0.037 | 6.46E-07 | 0.008  | 0.028 | 0.771 |
|                  | rs10424405  | -0.146 | 0.030 | 1.32E-06 | 0.047  | 0.033 | 0.156 |
|                  | rs10972130  | 0.147  | 0.031 | 2.29E-06 | 0.018  | 0.027 | 0.494 |
|                  | rs112081515 | -0.286 | 0.062 | 3.55E-06 | -0.016 | 0.058 | 0.777 |
|                  | rs11888059  | 0.115  | 0.025 | 3.02E-06 | 0.000  | 0.024 | 0.987 |
|                  | rs12493830  | -0.138 | 0.025 | 6.17E-08 | -0.037 | 0.021 | 0.078 |
|                  | rs140225543 | -0.553 | 0.119 | 3.47E-06 | 0.053  | 0.159 | 0.737 |
|                  | rs143365592 | 0.568  | 0.124 | 4.79E-06 | -0.161 | 0.148 | 0.276 |
|                  | rs144792666 | 0.485  | 0.101 | 1.45E-06 | -0.002 | 0.098 | 0.980 |
| ebi-a-GCST010779 | rs145533598 | 0.470  | 0.097 | 1.12E-06 | 0.112  | 0.086 | 0.192 |
| IL-1R1           | rs150889493 | -0.438 | 0.089 | 7.94E-07 | -0.092 | 0.089 | 0.303 |
|                  | rs1652049   | 0.128  | 0.027 | 1.62E-06 | 0.010  | 0.025 | 0.679 |
|                  | rs35583440  | 0.874  | 0.191 | 4.79E-06 | -0.066 | 0.189 | 0.728 |
|                  | rs4690014   | 0.133  | 0.026 | 2.69E-07 | 0.008  | 0.026 | 0.762 |
|                  | rs55923630  | -0.149 | 0.026 | 1.35E-08 | -0.002 | 0.023 | 0.936 |
|                  | rs71358078  | -0.406 | 0.085 | 1.86E-06 | -0.074 | 0.076 | 0.332 |
|                  | rs72771293  | 0.150  | 0.031 | 1.17E-06 | -0.039 | 0.026 | 0.140 |
|                  | rs76053345  | -0.756 | 0.157 | 1.38E-06 | -0.174 | 0.173 | 0.314 |
|                  | rs77451959  | 0.400  | 0.086 | 2.95E-06 | -0.094 | 0.084 | 0.264 |
|                  | rs78801677  | 0.206  | 0.044 | 3.31E-06 | 0.006  | 0.047 | 0.898 |
| <hr/>            |             |        |       |          |        |       |       |
|                  | rs10208542  | -0.185 | 0.037 | 6.46E-07 | -0.003 | 0.017 | 0.885 |
|                  | rs10424405  | -0.146 | 0.030 | 1.32E-06 | 0.017  | 0.018 | 0.353 |
|                  | rs10972130  | 0.147  | 0.031 | 2.29E-06 | 0.024  | 0.016 | 0.147 |
|                  | rs112081515 | -0.286 | 0.062 | 3.55E-06 | 0.045  | 0.034 | 0.193 |
|                  | rs11888059  | 0.115  | 0.025 | 3.02E-06 | 0.005  | 0.014 | 0.707 |
|                  | rs12493830  | -0.138 | 0.025 | 6.17E-08 | -0.013 | 0.013 | 0.305 |
|                  | rs140225543 | -0.553 | 0.119 | 3.47E-06 | 0.000  | 0.087 | 0.996 |
|                  | rs143365592 | 0.568  | 0.124 | 4.79E-06 | -0.172 | 0.081 | 0.034 |
|                  | rs144792666 | 0.485  | 0.101 | 1.45E-06 | 0.002  | 0.062 | 0.977 |
| ebi-a-GCST010780 | rs145533598 | 0.470  | 0.097 | 1.12E-06 | 0.003  | 0.055 | 0.958 |
|                  | rs150889493 | -0.438 | 0.089 | 7.94E-07 | 0.044  | 0.049 | 0.375 |
|                  | rs1652049   | 0.128  | 0.027 | 1.62E-06 | -0.001 | 0.014 | 0.953 |
|                  | rs35583440  | 0.874  | 0.191 | 4.79E-06 | -0.121 | 0.104 | 0.244 |
|                  | rs4690014   | 0.133  | 0.026 | 2.69E-07 | 0.015  | 0.014 | 0.291 |
|                  | rs55923630  | -0.149 | 0.026 | 1.35E-08 | 0.008  | 0.014 | 0.562 |
|                  | rs71358078  | -0.406 | 0.085 | 1.86E-06 | -0.003 | 0.049 | 0.946 |
|                  | rs72771293  | 0.150  | 0.031 | 1.17E-06 | -0.018 | 0.016 | 0.265 |
|                  | rs76053345  | -0.756 | 0.157 | 1.38E-06 | -0.096 | 0.105 | 0.360 |
|                  | rs77451959  | 0.400  | 0.086 | 2.95E-06 | -0.077 | 0.049 | 0.117 |

|                  |             |        |       |          |        |       |       |
|------------------|-------------|--------|-------|----------|--------|-------|-------|
|                  | rs78801677  | 0.206  | 0.044 | 3.31E-06 | -0.007 | 0.028 | 0.793 |
|                  | rs10208542  | -0.185 | 0.037 | 6.46E-07 | -0.035 | 0.040 | 0.381 |
|                  | rs10424405  | -0.146 | 0.030 | 1.32E-06 | -0.010 | 0.040 | 0.799 |
|                  | rs10972130  | 0.147  | 0.031 | 2.29E-06 | -0.075 | 0.033 | 0.022 |
|                  | rs112081515 | -0.286 | 0.062 | 3.55E-06 | -0.063 | 0.065 | 0.331 |
|                  | rs11888059  | 0.115  | 0.025 | 3.02E-06 | -0.007 | 0.026 | 0.785 |
|                  | rs12493830  | -0.138 | 0.025 | 6.17E-08 | 0.005  | 0.027 | 0.847 |
|                  | rs140225543 | -0.553 | 0.119 | 3.47E-06 | 0.228  | 0.168 | 0.175 |
|                  | rs143365592 | 0.568  | 0.124 | 4.79E-06 | -0.166 | 0.147 | 0.259 |
|                  | rs144792666 | 0.485  | 0.101 | 1.45E-06 | 0.062  | 0.118 | 0.602 |
| ebi-a-GCST010781 | rs145533598 | 0.470  | 0.097 | 1.12E-06 | -0.050 | 0.107 | 0.644 |
|                  | rs150889493 | -0.438 | 0.089 | 7.94E-07 | 0.063  | 0.109 | 0.563 |
|                  | rs1652049   | 0.128  | 0.027 | 1.62E-06 | -0.025 | 0.029 | 0.379 |
|                  | rs35583440  | 0.874  | 0.191 | 4.79E-06 | 0.319  | 0.157 | 0.042 |
|                  | rs4690014   | 0.133  | 0.026 | 2.69E-07 | 0.022  | 0.029 | 0.439 |
|                  | rs55923630  | -0.149 | 0.026 | 1.35E-08 | -0.011 | 0.029 | 0.709 |
|                  | rs71358078  | -0.406 | 0.085 | 1.86E-06 | 0.084  | 0.107 | 0.431 |
|                  | rs72771293  | 0.150  | 0.031 | 1.17E-06 | 0.050  | 0.033 | 0.126 |
|                  | rs76053345  | -0.756 | 0.157 | 1.38E-06 | -0.057 | 0.187 | 0.759 |
|                  | rs77451959  | 0.400  | 0.086 | 2.95E-06 | -0.016 | 0.103 | 0.876 |
|                  | rs78801677  | 0.206  | 0.044 | 3.31E-06 | -0.043 | 0.060 | 0.469 |
|                  | rs10208542  | -0.185 | 0.037 | 6.46E-07 | -0.028 | 0.053 | 0.602 |
|                  | rs10424405  | -0.146 | 0.030 | 1.32E-06 | 0.041  | 0.054 | 0.439 |
|                  | rs10972130  | 0.147  | 0.031 | 2.29E-06 | -0.034 | 0.053 | 0.518 |
|                  | rs112081515 | -0.286 | 0.062 | 3.55E-06 | -0.154 | 0.120 | 0.198 |
|                  | rs11888059  | 0.115  | 0.025 | 3.02E-06 | -0.008 | 0.042 | 0.853 |
|                  | rs12493830  | -0.138 | 0.025 | 6.17E-08 | -0.017 | 0.041 | 0.678 |
|                  | rs140225543 | -0.553 | 0.119 | 3.47E-06 | 0.032  | 0.269 | 0.906 |
|                  | rs143365592 | 0.568  | 0.124 | 4.79E-06 | 0.072  | 0.258 | 0.779 |
|                  | rs144792666 | 0.485  | 0.101 | 1.45E-06 | 0.046  | 0.228 | 0.841 |
| ebi-a-GCST010782 | rs145533598 | 0.470  | 0.097 | 1.12E-06 | -0.124 | 0.195 | 0.527 |
|                  | rs150889493 | -0.438 | 0.089 | 7.94E-07 | -0.079 | 0.160 | 0.623 |
|                  | rs1652049   | 0.128  | 0.027 | 1.62E-06 | 0.032  | 0.042 | 0.449 |
|                  | rs35583440  | 0.874  | 0.191 | 4.79E-06 | 0.111  | 0.360 | 0.759 |
|                  | rs4690014   | 0.133  | 0.026 | 2.69E-07 | -0.013 | 0.043 | 0.756 |
|                  | rs55923630  | -0.149 | 0.026 | 1.35E-08 | -0.041 | 0.046 | 0.376 |
|                  | rs71358078  | -0.406 | 0.085 | 1.86E-06 | 0.023  | 0.170 | 0.893 |
|                  | rs72771293  | 0.150  | 0.031 | 1.17E-06 | -0.114 | 0.054 | 0.034 |
|                  | rs76053345  | -0.756 | 0.157 | 1.38E-06 | 0.018  | 0.324 | 0.955 |
|                  | rs77451959  | 0.400  | 0.086 | 2.95E-06 | 0.027  | 0.157 | 0.866 |
|                  | rs78801677  | 0.206  | 0.044 | 3.31E-06 | -0.001 | 0.089 | 0.992 |
|                  | rs10208542  | -0.185 | 0.037 | 6.46E-07 | 0.003  | 0.039 | 0.941 |
|                  | rs10424405  | -0.146 | 0.030 | 1.32E-06 | -0.081 | 0.053 | 0.130 |
|                  | rs10972130  | 0.147  | 0.031 | 2.29E-06 | 0.031  | 0.035 | 0.377 |
|                  | rs112081515 | -0.286 | 0.062 | 3.55E-06 | -0.050 | 0.073 | 0.499 |
|                  | rs11888059  | 0.115  | 0.025 | 3.02E-06 | 0.042  | 0.036 | 0.247 |
|                  | rs12493830  | -0.138 | 0.025 | 6.17E-08 | -0.037 | 0.028 | 0.187 |
|                  | rs140225543 | -0.553 | 0.119 | 3.47E-06 | 0.064  | 0.237 | 0.787 |
|                  | rs143365592 | 0.568  | 0.124 | 4.79E-06 | -0.169 | 0.190 | 0.374 |
|                  | rs144792666 | 0.485  | 0.101 | 1.45E-06 | 0.079  | 0.120 | 0.513 |
| ebi-a-GCST010783 | rs145533598 | 0.470  | 0.097 | 1.12E-06 | 0.165  | 0.106 | 0.120 |
|                  | rs150889493 | -0.438 | 0.089 | 7.94E-07 | 0.001  | 0.125 | 0.992 |
|                  | rs1652049   | 0.128  | 0.027 | 1.62E-06 | 0.025  | 0.038 | 0.501 |
|                  | rs35583440  | 0.874  | 0.191 | 4.79E-06 | -0.030 | 0.231 | 0.895 |
|                  | rs4690014   | 0.133  | 0.026 | 2.69E-07 | 0.030  | 0.038 | 0.434 |
|                  | rs55923630  | -0.149 | 0.026 | 1.35E-08 | 0.004  | 0.030 | 0.882 |
|                  | rs71358078  | -0.406 | 0.085 | 1.86E-06 | -0.132 | 0.096 | 0.168 |
|                  | rs72771293  | 0.150  | 0.031 | 1.17E-06 | 0.000  | 0.034 | 0.995 |

|                  |             |        |       |          |        |       |       |
|------------------|-------------|--------|-------|----------|--------|-------|-------|
|                  | rs76053345  | -0.756 | 0.157 | 1.38E-06 | -0.339 | 0.207 | 0.101 |
|                  | rs77451959  | 0.400  | 0.086 | 2.95E-06 | -0.081 | 0.115 | 0.481 |
|                  | rs78801677  | 0.206  | 0.044 | 3.31E-06 | 0.055  | 0.064 | 0.390 |
|                  | rs1054402   | 0.131  | 0.027 | 1.13E-06 | -0.049 | 0.163 | 0.764 |
|                  | rs11627423  | 0.117  | 0.025 | 2.12E-06 | -0.114 | 0.151 | 0.453 |
|                  | rs11869294  | 0.227  | 0.047 | 1.50E-06 | 0.285  | 0.328 | 0.386 |
|                  | rs12121840  | 0.269  | 0.057 | 2.43E-06 | 0.249  | 0.301 | 0.408 |
| ebi-a-GCST010775 | rs187166731 | 0.233  | 0.051 | 4.70E-06 | -0.016 | 0.552 | 0.977 |
|                  | rs2809154   | 0.179  | 0.039 | 3.74E-06 | -0.074 | 0.225 | 0.742 |
|                  | rs56134659  | 0.112  | 0.024 | 2.44E-06 | 0.060  | 0.181 | 0.740 |
|                  | rs61335305  | 0.445  | 0.091 | 1.00E-06 | -0.369 | 0.451 | 0.413 |
|                  | rs9623661   | 0.197  | 0.043 | 3.86E-06 | 0.449  | 0.243 | 0.064 |
|                  | rs1054402   | 0.131  | 0.027 | 1.13E-06 | -0.039 | 0.019 | 0.040 |
|                  | rs11627423  | 0.117  | 0.025 | 2.12E-06 | -0.008 | 0.017 | 0.619 |
|                  | rs11869294  | 0.227  | 0.047 | 1.50E-06 | 0.033  | 0.046 | 0.477 |
|                  | rs12121840  | 0.269  | 0.057 | 2.43E-06 | -0.020 | 0.033 | 0.550 |
| ebi-a-GCST010776 | rs187166731 | 0.233  | 0.051 | 4.70E-06 | 0.022  | 0.098 | 0.827 |
|                  | rs2809154   | 0.179  | 0.039 | 3.74E-06 | 0.020  | 0.021 | 0.325 |
|                  | rs56134659  | 0.112  | 0.024 | 2.44E-06 | -0.015 | 0.018 | 0.399 |
|                  | rs61335305  | 0.445  | 0.091 | 1.00E-06 | 0.059  | 0.060 | 0.332 |
|                  | rs9623661   | 0.197  | 0.043 | 3.86E-06 | -0.017 | 0.028 | 0.540 |
|                  | rs1054402   | 0.131  | 0.027 | 1.13E-06 | -0.052 | 0.021 | 0.015 |
|                  | rs11627423  | 0.117  | 0.025 | 2.12E-06 | -0.038 | 0.018 | 0.033 |
|                  | rs11869294  | 0.227  | 0.047 | 1.50E-06 | -0.013 | 0.054 | 0.811 |
|                  | rs12121840  | 0.269  | 0.057 | 2.43E-06 | 0.010  | 0.037 | 0.785 |
| ebi-a-GCST010777 | rs187166731 | 0.233  | 0.051 | 4.70E-06 | 0.179  | 0.127 | 0.159 |
|                  | rs2809154   | 0.179  | 0.039 | 3.74E-06 | 0.006  | 0.024 | 0.788 |
|                  | rs56134659  | 0.112  | 0.024 | 2.44E-06 | 0.033  | 0.019 | 0.077 |
|                  | rs61335305  | 0.445  | 0.091 | 1.00E-06 | 0.028  | 0.042 | 0.504 |
|                  | rs9623661   | 0.197  | 0.043 | 3.86E-06 | -0.027 | 0.030 | 0.374 |
|                  | rs1054402   | 0.131  | 0.027 | 1.13E-06 | -0.052 | 0.021 | 0.015 |
|                  | rs11627423  | 0.117  | 0.025 | 2.12E-06 | -0.038 | 0.018 | 0.033 |
|                  | rs11869294  | 0.227  | 0.047 | 1.50E-06 | -0.013 | 0.054 | 0.811 |
|                  | rs12121840  | 0.269  | 0.057 | 2.43E-06 | 0.010  | 0.037 | 0.785 |
| ebi-a-GCST010778 | rs187166731 | 0.233  | 0.051 | 4.70E-06 | 0.179  | 0.127 | 0.159 |
|                  | rs2809154   | 0.179  | 0.039 | 3.74E-06 | 0.006  | 0.024 | 0.788 |
|                  | rs56134659  | 0.112  | 0.024 | 2.44E-06 | 0.033  | 0.019 | 0.077 |
|                  | rs61335305  | 0.445  | 0.091 | 1.00E-06 | 0.028  | 0.042 | 0.504 |
|                  | rs9623661   | 0.197  | 0.043 | 3.86E-06 | -0.027 | 0.030 | 0.374 |
|                  | rs1054402   | 0.131  | 0.027 | 1.13E-06 | 0.021  | 0.029 | 0.474 |
|                  | rs11627423  | 0.117  | 0.025 | 2.12E-06 | -0.014 | 0.026 | 0.583 |
|                  | rs11869294  | 0.227  | 0.047 | 1.50E-06 | -0.024 | 0.073 | 0.744 |
|                  | rs12121840  | 0.269  | 0.057 | 2.43E-06 | 0.015  | 0.051 | 0.767 |
| ebi-a-GCST010779 | rs187166731 | 0.233  | 0.051 | 4.70E-06 | 0.042  | 0.182 | 0.815 |
|                  | rs2809154   | 0.179  | 0.039 | 3.74E-06 | 0.035  | 0.029 | 0.235 |
|                  | rs56134659  | 0.112  | 0.024 | 2.44E-06 | 0.021  | 0.037 | 0.575 |
|                  | rs61335305  | 0.445  | 0.091 | 1.00E-06 | 0.074  | 0.067 | 0.268 |
|                  | rs9623661   | 0.197  | 0.043 | 3.86E-06 | -0.087 | 0.045 | 0.053 |
| IL-1Ra           | rs1054402   | 0.131  | 0.027 | 1.13E-06 | -0.025 | 0.017 | 0.140 |
|                  | rs11627423  | 0.117  | 0.025 | 2.12E-06 | -0.021 | 0.015 | 0.173 |
|                  | rs11869294  | 0.227  | 0.047 | 1.50E-06 | -0.022 | 0.040 | 0.587 |
|                  | rs12121840  | 0.269  | 0.057 | 2.43E-06 | 0.005  | 0.031 | 0.883 |
| ebi-a-GCST010780 | rs187166731 | 0.233  | 0.051 | 4.70E-06 | 0.035  | 0.097 | 0.718 |
|                  | rs2809154   | 0.179  | 0.039 | 3.74E-06 | 0.023  | 0.018 | 0.206 |
|                  | rs56134659  | 0.112  | 0.024 | 2.44E-06 | 0.011  | 0.021 | 0.598 |
|                  | rs61335305  | 0.445  | 0.091 | 1.00E-06 | 0.017  | 0.038 | 0.653 |
|                  | rs9623661   | 0.197  | 0.043 | 3.86E-06 | -0.025 | 0.026 | 0.322 |
|                  | rs1054402   | 0.131  | 0.027 | 1.13E-06 | -0.008 | 0.030 | 0.800 |

|                  |             |        |       |           |        |       |       |
|------------------|-------------|--------|-------|-----------|--------|-------|-------|
|                  | rs11627423  | 0.117  | 0.025 | 2.12E-06  | 0.005  | 0.027 | 0.856 |
|                  | rs11869294  | 0.227  | 0.047 | 1.50E-06  | 0.134  | 0.092 | 0.146 |
|                  | rs12121840  | 0.269  | 0.057 | 2.43E-06  | -0.014 | 0.058 | 0.812 |
| ebi-a-GCST010781 | rs147747784 | 0.365  | 0.076 | 1.46E-06  | -0.255 | 0.146 | 0.079 |
|                  | rs187166731 | 0.233  | 0.051 | 4.70E-06  | 0.191  | 0.151 | 0.205 |
|                  | rs2809154   | 0.179  | 0.039 | 3.74E-06  | -0.024 | 0.036 | 0.503 |
|                  | rs56134659  | 0.112  | 0.024 | 2.44E-06  | 0.071  | 0.038 | 0.062 |
|                  | rs61335305  | 0.445  | 0.091 | 1.00E-06  | 0.124  | 0.170 | 0.466 |
|                  | rs9623661   | 0.197  | 0.043 | 3.86E-06  | 0.050  | 0.050 | 0.317 |
|                  | rs1054402   | 0.131  | 0.027 | 1.13E-06  | 0.067  | 0.057 | 0.243 |
|                  | rs11627423  | 0.117  | 0.025 | 2.12E-06  | -0.066 | 0.048 | 0.170 |
|                  | rs11869294  | 0.227  | 0.047 | 1.50E-06  | 0.027  | 0.146 | 0.856 |
|                  | rs12121840  | 0.269  | 0.057 | 2.43E-06  | 0.023  | 0.099 | 0.820 |
| ebi-a-GCST010782 | rs187166731 | 0.233  | 0.051 | 4.70E-06  | 0.117  | 0.306 | 0.704 |
|                  | rs2809154   | 0.179  | 0.039 | 3.74E-06  | 0.028  | 0.065 | 0.671 |
|                  | rs56134659  | 0.112  | 0.024 | 2.44E-06  | 0.038  | 0.051 | 0.453 |
|                  | rs61335305  | 0.445  | 0.091 | 1.00E-06  | -0.037 | 0.101 | 0.715 |
|                  | rs9623661   | 0.197  | 0.043 | 3.86E-06  | -0.074 | 0.075 | 0.327 |
|                  | rs1054402   | 0.131  | 0.027 | 1.13E-06  | 0.023  | 0.040 | 0.569 |
|                  | rs11627423  | 0.117  | 0.025 | 2.12E-06  | -0.016 | 0.038 | 0.669 |
|                  | rs11869294  | 0.227  | 0.047 | 1.50E-06  | 0.115  | 0.100 | 0.250 |
|                  | rs12121840  | 0.269  | 0.057 | 2.43E-06  | 0.082  | 0.070 | 0.243 |
| ebi-a-GCST010783 | rs187166731 | 0.233  | 0.051 | 4.70E-06  | -0.089 | 0.220 | 0.687 |
|                  | rs2809154   | 0.179  | 0.039 | 3.74E-06  | 0.058  | 0.037 | 0.118 |
|                  | rs56134659  | 0.112  | 0.024 | 2.44E-06  | -0.040 | 0.038 | 0.292 |
|                  | rs61335305  | 0.445  | 0.091 | 1.00E-06  | 0.114  | 0.114 | 0.319 |
|                  | rs9623661   | 0.197  | 0.043 | 3.86E-06  | -0.040 | 0.065 | 0.546 |
|                  | rs1024949   | -0.448 | 0.040 | 2.95E-29  | -0.257 | 0.221 | 0.245 |
|                  | rs113553332 | 0.685  | 0.056 | 4.68E-34  | 0.198  | 0.383 | 0.606 |
|                  | rs13059920  | 0.420  | 0.038 | 9.33E-29  | 0.007  | 0.242 | 0.975 |
|                  | rs13084868  | 0.178  | 0.039 | 4.27E-06  | -0.062 | 0.209 | 0.768 |
|                  | rs148996090 | 1.111  | 0.137 | 3.98E-16  | 1.174  | 0.650 | 0.071 |
|                  | rs1607264   | -0.146 | 0.031 | 2.82E-06  | 0.203  | 0.186 | 0.275 |
|                  | rs16969649  | -0.140 | 0.031 | 4.90E-06  | -0.233 | 0.183 | 0.202 |
|                  | rs1988743   | 0.135  | 0.028 | 1.51E-06  | -0.091 | 0.178 | 0.608 |
|                  | rs2885370   | -0.209 | 0.031 | 8.91E-12  | -0.081 | 0.185 | 0.663 |
|                  | rs3935774   | 0.741  | 0.112 | 3.55E-11  | -0.678 | 0.518 | 0.191 |
|                  | rs41268633  | -0.251 | 0.050 | 6.03E-07  | 0.542  | 0.380 | 0.153 |
|                  | rs4624606   | -0.925 | 0.025 | 1.00E-200 | -0.144 | 0.185 | 0.437 |
|                  | rs4687154   | -0.581 | 0.040 | 7.94E-49  | 0.144  | 0.262 | 0.582 |
| ebi-a-GCST010775 | rs4815878   | 0.155  | 0.030 | 1.95E-07  | 0.355  | 0.168 | 0.035 |
|                  | rs5753690   | 0.149  | 0.029 | 2.95E-07  | -0.269 | 0.174 | 0.123 |
|                  | rs61492644  | -0.124 | 0.025 | 7.41E-07  | 0.002  | 0.156 | 0.990 |
|                  | rs62116908  | -0.294 | 0.064 | 3.72E-06  | 0.039  | 0.422 | 0.926 |
|                  | rs62196769  | -0.205 | 0.044 | 3.09E-06  | -0.259 | 0.219 | 0.237 |
|                  | rs6444430   | 0.154  | 0.033 | 2.29E-06  | -0.025 | 0.206 | 0.905 |
|                  | rs6444435   | -0.171 | 0.026 | 5.37E-11  | -0.064 | 0.155 | 0.679 |
|                  | rs6461953   | -0.146 | 0.032 | 4.68E-06  | 0.339  | 0.189 | 0.073 |
|                  | rs67249092  | -0.379 | 0.035 | 5.25E-28  | 0.035  | 0.227 | 0.879 |
|                  | rs6796131   | -0.244 | 0.026 | 1.51E-20  | -0.228 | 0.165 | 0.166 |
|                  | rs6801017   | -0.202 | 0.031 | 3.80E-11  | 0.122  | 0.186 | 0.512 |
|                  | rs73754360  | 0.384  | 0.080 | 1.78E-06  | 0.187  | 0.495 | 0.705 |
|                  | rs75857200  | 0.199  | 0.042 | 2.34E-06  | -0.175 | 0.285 | 0.538 |
|                  | rs7623802   | -0.129 | 0.027 | 1.41E-06  | -0.033 | 0.156 | 0.834 |
|                  | rs78129851  | 0.793  | 0.117 | 1.07E-11  | -0.842 | 0.658 | 0.200 |
|                  | rs1024949   | -0.448 | 0.040 | 2.95E-29  | -0.025 | 0.028 | 0.371 |
|                  | rs113553332 | 0.685  | 0.056 | 4.68E-34  | 0.048  | 0.037 | 0.199 |
|                  | rs13059920  | 0.420  | 0.038 | 9.33E-29  | -0.010 | 0.025 | 0.669 |

|                  |             |        |       |           |        |       |       |
|------------------|-------------|--------|-------|-----------|--------|-------|-------|
|                  | rs13084868  | 0.178  | 0.039 | 4.27E-06  | -0.025 | 0.022 | 0.240 |
|                  | rs148996090 | 1.111  | 0.137 | 3.98E-16  | -0.094 | 0.116 | 0.417 |
|                  | rs1607264   | -0.146 | 0.031 | 2.82E-06  | 0.005  | 0.019 | 0.801 |
|                  | rs16969649  | -0.140 | 0.031 | 4.90E-06  | 0.030  | 0.019 | 0.110 |
|                  | rs1988743   | 0.135  | 0.028 | 1.51E-06  | -0.003 | 0.021 | 0.892 |
|                  | rs2885370   | -0.209 | 0.031 | 8.91E-12  | 0.013  | 0.021 | 0.521 |
|                  | rs3935774   | 0.741  | 0.112 | 3.55E-11  | 0.059  | 0.059 | 0.320 |
|                  | rs41268633  | -0.251 | 0.050 | 6.03E-07  | 0.027  | 0.039 | 0.496 |
|                  | rs4624606   | -0.925 | 0.025 | 1.00E-200 | 0.007  | 0.021 | 0.744 |
|                  | rs4687154   | -0.581 | 0.040 | 7.94E-49  | -0.015 | 0.026 | 0.561 |
| ebi-a-GCST010776 | rs4815878   | 0.155  | 0.030 | 1.95E-07  | -0.008 | 0.018 | 0.663 |
|                  | rs5753690   | 0.149  | 0.029 | 2.95E-07  | 0.014  | 0.017 | 0.408 |
|                  | rs61492644  | -0.124 | 0.025 | 7.41E-07  | 0.005  | 0.017 | 0.768 |
|                  | rs62116908  | -0.294 | 0.064 | 3.72E-06  | -0.026 | 0.040 | 0.511 |
|                  | rs62196769  | -0.205 | 0.044 | 3.09E-06  | -0.044 | 0.026 | 0.089 |
|                  | rs6444430   | 0.154  | 0.033 | 2.29E-06  | 0.006  | 0.024 | 0.792 |
|                  | rs6444435   | -0.171 | 0.026 | 5.37E-11  | -0.006 | 0.018 | 0.720 |
|                  | rs6461953   | -0.146 | 0.032 | 4.68E-06  | 0.006  | 0.019 | 0.751 |
|                  | rs67249092  | -0.379 | 0.035 | 5.25E-28  | -0.002 | 0.021 | 0.917 |
|                  | rs6796131   | -0.244 | 0.026 | 1.51E-20  | -0.019 | 0.015 | 0.202 |
|                  | rs6801017   | -0.202 | 0.031 | 3.80E-11  | -0.016 | 0.019 | 0.413 |
|                  | rs73754360  | 0.384  | 0.080 | 1.78E-06  | -0.012 | 0.043 | 0.787 |
|                  | rs75857200  | 0.199  | 0.042 | 2.34E-06  | 0.044  | 0.026 | 0.095 |
|                  | rs7623802   | -0.129 | 0.027 | 1.41E-06  | -0.018 | 0.015 | 0.236 |
|                  | rs78129851  | 0.793  | 0.117 | 1.07E-11  | 0.066  | 0.091 | 0.469 |
| <hr/>            |             |        |       |           |        |       |       |
|                  | rs1024949   | -0.448 | 0.040 | 2.95E-29  | -0.030 | 0.031 | 0.341 |
|                  | rs113553332 | 0.685  | 0.056 | 4.68E-34  | 0.046  | 0.044 | 0.296 |
|                  | rs13059920  | 0.420  | 0.038 | 9.33E-29  | -0.011 | 0.025 | 0.667 |
|                  | rs13084868  | 0.178  | 0.039 | 4.27E-06  | 0.008  | 0.022 | 0.719 |
|                  | rs148996090 | 1.111  | 0.137 | 3.98E-16  | -0.139 | 0.144 | 0.335 |
|                  | rs1607264   | -0.146 | 0.031 | 2.82E-06  | 0.012  | 0.019 | 0.506 |
|                  | rs16969649  | -0.140 | 0.031 | 4.90E-06  | 0.044  | 0.020 | 0.030 |
|                  | rs1988743   | 0.135  | 0.028 | 1.51E-06  | -0.007 | 0.024 | 0.765 |
|                  | rs2885370   | -0.209 | 0.031 | 8.91E-12  | 0.030  | 0.023 | 0.184 |
|                  | rs3935774   | 0.741  | 0.112 | 3.55E-11  | 0.047  | 0.043 | 0.284 |
|                  | rs41268633  | -0.251 | 0.050 | 6.03E-07  | 0.032  | 0.043 | 0.457 |
|                  | rs4624606   | -0.925 | 0.025 | 1.00E-200 | 0.008  | 0.023 | 0.735 |
|                  | rs4687154   | -0.581 | 0.040 | 7.94E-49  | -0.020 | 0.028 | 0.470 |
| ebi-a-GCST010777 | rs4815878   | 0.155  | 0.030 | 1.95E-07  | -0.013 | 0.019 | 0.492 |
|                  | rs5753690   | 0.149  | 0.029 | 2.95E-07  | 0.023  | 0.018 | 0.193 |
|                  | rs61492644  | -0.124 | 0.025 | 7.41E-07  | 0.021  | 0.018 | 0.247 |
|                  | rs62116908  | -0.294 | 0.064 | 3.72E-06  | -0.007 | 0.046 | 0.884 |
|                  | rs62196769  | -0.205 | 0.044 | 3.09E-06  | -0.014 | 0.027 | 0.608 |
|                  | rs6444430   | 0.154  | 0.033 | 2.29E-06  | 0.003  | 0.025 | 0.900 |
|                  | rs6444435   | -0.171 | 0.026 | 5.37E-11  | 0.006  | 0.020 | 0.758 |
|                  | rs6461953   | -0.146 | 0.032 | 4.68E-06  | 0.026  | 0.019 | 0.179 |
|                  | rs67249092  | -0.379 | 0.035 | 5.25E-28  | -0.003 | 0.021 | 0.890 |
|                  | rs6796131   | -0.244 | 0.026 | 1.51E-20  | -0.005 | 0.016 | 0.776 |
|                  | rs6801017   | -0.202 | 0.031 | 3.80E-11  | -0.016 | 0.019 | 0.399 |
|                  | rs73754360  | 0.384  | 0.080 | 1.78E-06  | 0.018  | 0.041 | 0.659 |
|                  | rs75857200  | 0.199  | 0.042 | 2.34E-06  | 0.026  | 0.028 | 0.369 |
|                  | rs7623802   | -0.129 | 0.027 | 1.41E-06  | -0.015 | 0.017 | 0.380 |
|                  | rs78129851  | 0.793  | 0.117 | 1.07E-11  | 0.160  | 0.111 | 0.149 |
| <hr/>            |             |        |       |           |        |       |       |
|                  | rs1024949   | -0.448 | 0.040 | 2.95E-29  | -0.030 | 0.031 | 0.341 |
|                  | rs113553332 | 0.685  | 0.056 | 4.68E-34  | 0.046  | 0.044 | 0.296 |
|                  | rs13059920  | 0.420  | 0.038 | 9.33E-29  | -0.011 | 0.025 | 0.667 |
|                  | rs13084868  | 0.178  | 0.039 | 4.27E-06  | 0.008  | 0.022 | 0.719 |
|                  | rs148996090 | 1.111  | 0.137 | 3.98E-16  | -0.139 | 0.144 | 0.335 |



|                           |             |        |       |           |        |       |       |
|---------------------------|-------------|--------|-------|-----------|--------|-------|-------|
|                           | rs1607264   | -0.146 | 0.031 | 2.82E-06  | 0.012  | 0.019 | 0.506 |
|                           | rs16969649  | -0.140 | 0.031 | 4.90E-06  | 0.044  | 0.020 | 0.030 |
|                           | rs1988743   | 0.135  | 0.028 | 1.51E-06  | -0.007 | 0.024 | 0.765 |
|                           | rs2885370   | -0.209 | 0.031 | 8.91E-12  | 0.030  | 0.023 | 0.184 |
|                           | rs3935774   | 0.741  | 0.112 | 3.55E-11  | 0.047  | 0.043 | 0.284 |
|                           | rs41268633  | -0.251 | 0.050 | 6.03E-07  | 0.032  | 0.043 | 0.457 |
|                           | rs4624606   | -0.925 | 0.025 | 1.00E-200 | 0.008  | 0.023 | 0.735 |
|                           | rs4687154   | -0.581 | 0.040 | 7.94E-49  | -0.020 | 0.028 | 0.470 |
| ebi-a-GCST010778          | rs4815878   | 0.155  | 0.030 | 1.95E-07  | -0.013 | 0.019 | 0.492 |
|                           | rs5753690   | 0.149  | 0.029 | 2.95E-07  | 0.023  | 0.018 | 0.193 |
|                           | rs61492644  | -0.124 | 0.025 | 7.41E-07  | 0.021  | 0.018 | 0.247 |
|                           | rs62116908  | -0.294 | 0.064 | 3.72E-06  | -0.007 | 0.046 | 0.884 |
|                           | rs62196769  | -0.205 | 0.044 | 3.09E-06  | -0.014 | 0.027 | 0.608 |
|                           | rs6444430   | 0.154  | 0.033 | 2.29E-06  | 0.003  | 0.025 | 0.900 |
|                           | rs6444435   | -0.171 | 0.026 | 5.37E-11  | 0.006  | 0.020 | 0.758 |
|                           | rs6461953   | -0.146 | 0.032 | 4.68E-06  | 0.026  | 0.019 | 0.179 |
|                           | rs67249092  | -0.379 | 0.035 | 5.25E-28  | -0.003 | 0.021 | 0.890 |
|                           | rs6796131   | -0.244 | 0.026 | 1.51E-20  | -0.005 | 0.016 | 0.776 |
|                           | rs6801017   | -0.202 | 0.031 | 3.80E-11  | -0.016 | 0.019 | 0.399 |
|                           | rs73754360  | 0.384  | 0.080 | 1.78E-06  | 0.018  | 0.041 | 0.659 |
|                           | rs75857200  | 0.199  | 0.042 | 2.34E-06  | 0.026  | 0.028 | 0.369 |
|                           | rs7623802   | -0.129 | 0.027 | 1.41E-06  | -0.015 | 0.017 | 0.380 |
|                           | rs78129851  | 0.793  | 0.117 | 1.07E-11  | 0.160  | 0.111 | 0.149 |
| <hr/>                     |             |        |       |           |        |       |       |
|                           | rs1024949   | -0.448 | 0.040 | 2.95E-29  | 0.006  | 0.044 | 0.886 |
|                           | rs113553332 | 0.685  | 0.056 | 4.68E-34  | 0.001  | 0.053 | 0.983 |
|                           | rs13059920  | 0.420  | 0.038 | 9.33E-29  | 0.075  | 0.039 | 0.055 |
|                           | rs13084868  | 0.178  | 0.039 | 4.27E-06  | -0.037 | 0.030 | 0.212 |
|                           | rs148996090 | 1.111  | 0.137 | 3.98E-16  | 0.069  | 0.223 | 0.758 |
|                           | rs1607264   | -0.146 | 0.031 | 2.82E-06  | 0.039  | 0.028 | 0.170 |
|                           | rs16969649  | -0.140 | 0.031 | 4.90E-06  | -0.005 | 0.025 | 0.844 |
|                           | rs1988743   | 0.135  | 0.028 | 1.51E-06  | -0.036 | 0.031 | 0.244 |
|                           | rs2885370   | -0.209 | 0.031 | 8.91E-12  | 0.022  | 0.034 | 0.513 |
|                           | rs3935774   | 0.741  | 0.112 | 3.55E-11  | 0.031  | 0.060 | 0.608 |
|                           | rs41268633  | -0.251 | 0.050 | 6.03E-07  | 0.088  | 0.079 | 0.263 |
|                           | rs4624606   | -0.925 | 0.025 | 1.00E-200 | 0.012  | 0.031 | 0.702 |
|                           | rs4687154   | -0.581 | 0.040 | 7.94E-49  | -0.031 | 0.044 | 0.485 |
| IL-1Racp ebi-a-GCST010779 | rs4815878   | 0.155  | 0.030 | 1.95E-07  | 0.052  | 0.029 | 0.069 |
|                           | rs5753690   | 0.149  | 0.029 | 2.95E-07  | 0.027  | 0.024 | 0.272 |
|                           | rs61492644  | -0.124 | 0.025 | 7.41E-07  | 0.017  | 0.028 | 0.536 |
|                           | rs62116908  | -0.294 | 0.064 | 3.72E-06  | -0.025 | 0.062 | 0.691 |
|                           | rs62196769  | -0.205 | 0.044 | 3.09E-06  | -0.048 | 0.037 | 0.190 |
|                           | rs6444430   | 0.154  | 0.033 | 2.29E-06  | 0.043  | 0.046 | 0.346 |
|                           | rs6444435   | -0.171 | 0.026 | 5.37E-11  | -0.048 | 0.029 | 0.100 |
|                           | rs6461953   | -0.146 | 0.032 | 4.68E-06  | 0.030  | 0.026 | 0.253 |
|                           | rs67249092  | -0.379 | 0.035 | 5.25E-28  | 0.024  | 0.033 | 0.461 |
|                           | rs6796131   | -0.244 | 0.026 | 1.51E-20  | -0.031 | 0.022 | 0.153 |
|                           | rs6801017   | -0.202 | 0.031 | 3.80E-11  | -0.018 | 0.029 | 0.537 |
|                           | rs73754360  | 0.384  | 0.080 | 1.78E-06  | -0.009 | 0.055 | 0.870 |
|                           | rs75857200  | 0.199  | 0.042 | 2.34E-06  | -0.030 | 0.043 | 0.477 |
|                           | rs7623802   | -0.129 | 0.027 | 1.41E-06  | -0.006 | 0.022 | 0.785 |
|                           | rs78129851  | 0.793  | 0.117 | 1.07E-11  | 0.029  | 0.127 | 0.820 |
| <hr/>                     |             |        |       |           |        |       |       |
|                           | rs1024949   | -0.448 | 0.040 | 2.95E-29  | -0.007 | 0.025 | 0.774 |
|                           | rs113553332 | 0.685  | 0.056 | 4.68E-34  | 0.025  | 0.035 | 0.483 |
|                           | rs13059920  | 0.420  | 0.038 | 9.33E-29  | -0.008 | 0.022 | 0.727 |
|                           | rs13084868  | 0.178  | 0.039 | 4.27E-06  | -0.004 | 0.018 | 0.821 |
|                           | rs148996090 | 1.111  | 0.137 | 3.98E-16  | -0.133 | 0.111 | 0.229 |
|                           | rs1607264   | -0.146 | 0.031 | 2.82E-06  | 0.019  | 0.016 | 0.233 |
|                           | rs16969649  | -0.140 | 0.031 | 4.90E-06  | 0.028  | 0.017 | 0.097 |

|                  |             |        |       |           |        |       |       |
|------------------|-------------|--------|-------|-----------|--------|-------|-------|
|                  | rs1988743   | 0.135  | 0.028 | 1.51E-06  | 0.001  | 0.018 | 0.946 |
|                  | rs2885370   | -0.209 | 0.031 | 8.91E-12  | 0.002  | 0.019 | 0.897 |
|                  | rs3935774   | 0.741  | 0.112 | 3.55E-11  | 0.041  | 0.035 | 0.245 |
|                  | rs41268633  | -0.251 | 0.050 | 6.03E-07  | 0.036  | 0.037 | 0.325 |
|                  | rs4624606   | -0.925 | 0.025 | 1.00E-200 | 0.009  | 0.018 | 0.610 |
|                  | rs4687154   | -0.581 | 0.040 | 7.94E-49  | -0.018 | 0.024 | 0.471 |
| ebi-a-GCST010780 | rs4815878   | 0.155  | 0.030 | 1.95E-07  | -0.005 | 0.016 | 0.765 |
|                  | rs5753690   | 0.149  | 0.029 | 2.95E-07  | 0.022  | 0.015 | 0.134 |
|                  | rs61492644  | -0.124 | 0.025 | 7.41E-07  | 0.008  | 0.015 | 0.586 |
|                  | rs62116908  | -0.294 | 0.064 | 3.72E-06  | -0.026 | 0.038 | 0.496 |
|                  | rs62196769  | -0.205 | 0.044 | 3.09E-06  | -0.038 | 0.022 | 0.087 |
|                  | rs6444430   | 0.154  | 0.033 | 2.29E-06  | 0.016  | 0.023 | 0.480 |
|                  | rs6444435   | -0.171 | 0.026 | 5.37E-11  | -0.015 | 0.016 | 0.350 |
|                  | rs6461953   | -0.146 | 0.032 | 4.68E-06  | 0.017  | 0.016 | 0.296 |
|                  | rs67249092  | -0.379 | 0.035 | 5.25E-28  | 0.003  | 0.018 | 0.873 |
|                  | rs6796131   | -0.244 | 0.026 | 1.51E-20  | -0.007 | 0.013 | 0.627 |
|                  | rs6801017   | -0.202 | 0.031 | 3.80E-11  | -0.020 | 0.016 | 0.206 |
|                  | rs73754360  | 0.384  | 0.080 | 1.78E-06  | -0.009 | 0.035 | 0.806 |
|                  | rs75857200  | 0.199  | 0.042 | 2.34E-06  | 0.037  | 0.024 | 0.133 |
|                  | rs7623802   | -0.129 | 0.027 | 1.41E-06  | -0.012 | 0.014 | 0.396 |
|                  | rs78129851  | 0.793  | 0.117 | 1.07E-11  | 0.049  | 0.083 | 0.556 |
| <hr/>            |             |        |       |           |        |       |       |
|                  | rs1024949   | -0.448 | 0.040 | 2.95E-29  | -0.002 | 0.048 | 0.967 |
|                  | rs113553332 | 0.685  | 0.056 | 4.68E-34  | -0.019 | 0.065 | 0.773 |
|                  | rs13059920  | 0.420  | 0.038 | 9.33E-29  | 0.009  | 0.043 | 0.835 |
|                  | rs13084868  | 0.178  | 0.039 | 4.27E-06  | -0.041 | 0.039 | 0.287 |
|                  | rs148996090 | 1.111  | 0.137 | 3.98E-16  | -0.135 | 0.205 | 0.512 |
|                  | rs1607264   | -0.146 | 0.031 | 2.82E-06  | -0.033 | 0.035 | 0.345 |
|                  | rs16969649  | -0.140 | 0.031 | 4.90E-06  | -0.004 | 0.032 | 0.898 |
|                  | rs1988743   | 0.135  | 0.028 | 1.51E-06  | 0.077  | 0.033 | 0.018 |
|                  | rs2885370   | -0.209 | 0.031 | 8.91E-12  | -0.096 | 0.036 | 0.009 |
|                  | rs3935774   | 0.741  | 0.112 | 3.55E-11  | 0.246  | 0.137 | 0.073 |
|                  | rs41268633  | -0.251 | 0.050 | 6.03E-07  | -0.007 | 0.065 | 0.914 |
|                  | rs4624606   | -0.925 | 0.025 | 1.00E-200 | -0.043 | 0.035 | 0.214 |
|                  | rs4687154   | -0.581 | 0.040 | 7.94E-49  | -0.024 | 0.054 | 0.657 |
| ebi-a-GCST010781 | rs4815878   | 0.155  | 0.030 | 1.95E-07  | -0.015 | 0.038 | 0.696 |
|                  | rs5753690   | 0.149  | 0.029 | 2.95E-07  | 0.075  | 0.031 | 0.016 |
|                  | rs61492644  | -0.124 | 0.025 | 7.41E-07  | -0.006 | 0.027 | 0.822 |
|                  | rs62116908  | -0.294 | 0.064 | 3.72E-06  | -0.022 | 0.076 | 0.775 |
|                  | rs62196769  | -0.205 | 0.044 | 3.09E-06  | -0.026 | 0.046 | 0.569 |
|                  | rs6444430   | 0.154  | 0.033 | 2.29E-06  | 0.066  | 0.044 | 0.134 |
|                  | rs6444435   | -0.171 | 0.026 | 5.37E-11  | -0.008 | 0.031 | 0.804 |
|                  | rs6461953   | -0.146 | 0.032 | 4.68E-06  | -0.061 | 0.037 | 0.096 |
|                  | rs67249092  | -0.379 | 0.035 | 5.25E-28  | 0.051  | 0.042 | 0.218 |
|                  | rs6796131   | -0.244 | 0.026 | 1.51E-20  | -0.058 | 0.029 | 0.042 |
|                  | rs6801017   | -0.202 | 0.031 | 3.80E-11  | -0.055 | 0.033 | 0.095 |
|                  | rs73754360  | 0.384  | 0.080 | 1.78E-06  | -0.079 | 0.071 | 0.267 |
|                  | rs75857200  | 0.199  | 0.042 | 2.34E-06  | -0.002 | 0.047 | 0.964 |
|                  | rs7623802   | -0.129 | 0.027 | 1.41E-06  | 0.001  | 0.028 | 0.977 |
|                  | rs78129851  | 0.793  | 0.117 | 1.07E-11  | 0.304  | 0.157 | 0.053 |
| <hr/>            |             |        |       |           |        |       |       |
|                  | rs1024949   | -0.448 | 0.040 | 2.95E-29  | -0.013 | 0.082 | 0.872 |
|                  | rs113553332 | 0.685  | 0.056 | 4.68E-34  | -0.055 | 0.110 | 0.619 |
|                  | rs13059920  | 0.420  | 0.038 | 9.33E-29  | 0.087  | 0.064 | 0.177 |
|                  | rs13084868  | 0.178  | 0.039 | 4.27E-06  | -0.018 | 0.055 | 0.750 |
|                  | rs148996090 | 1.111  | 0.137 | 3.98E-16  | 0.378  | 0.363 | 0.297 |
|                  | rs1607264   | -0.146 | 0.031 | 2.82E-06  | 0.103  | 0.046 | 0.024 |
|                  | rs16969649  | -0.140 | 0.031 | 4.90E-06  | -0.004 | 0.049 | 0.934 |
|                  | rs1988743   | 0.135  | 0.028 | 1.51E-06  | -0.055 | 0.063 | 0.380 |
|                  | rs2885370   | -0.209 | 0.031 | 8.91E-12  | 0.056  | 0.061 | 0.360 |

|                  |             |        |       |           |        |       |       |
|------------------|-------------|--------|-------|-----------|--------|-------|-------|
|                  | rs3935774   | 0.741  | 0.112 | 3.55E-11  | 0.040  | 0.102 | 0.691 |
|                  | rs41268633  | -0.251 | 0.050 | 6.03E-07  | -0.011 | 0.129 | 0.933 |
|                  | rs4624606   | -0.925 | 0.025 | 1.00E-200 | 0.009  | 0.062 | 0.883 |
|                  | rs4687154   | -0.581 | 0.040 | 7.94E-49  | -0.008 | 0.073 | 0.913 |
| ebi-a-GCST010782 | rs4815878   | 0.155  | 0.030 | 1.95E-07  | 0.083  | 0.047 | 0.077 |
|                  | rs5753690   | 0.149  | 0.029 | 2.95E-07  | 0.012  | 0.045 | 0.793 |
|                  | rs61492644  | -0.124 | 0.025 | 7.41E-07  | -0.025 | 0.049 | 0.613 |
|                  | rs62116908  | -0.294 | 0.064 | 3.72E-06  | 0.002  | 0.121 | 0.989 |
|                  | rs62196769  | -0.205 | 0.044 | 3.09E-06  | -0.083 | 0.069 | 0.231 |
|                  | rs6444430   | 0.154  | 0.033 | 2.29E-06  | 0.113  | 0.073 | 0.120 |
|                  | rs6444435   | -0.171 | 0.026 | 5.37E-11  | -0.037 | 0.056 | 0.508 |
|                  | rs6461953   | -0.146 | 0.032 | 4.68E-06  | -0.028 | 0.049 | 0.565 |
|                  | rs67249092  | -0.379 | 0.035 | 5.25E-28  | 0.055  | 0.054 | 0.312 |
|                  | rs6796131   | -0.244 | 0.026 | 1.51E-20  | -0.041 | 0.042 | 0.332 |
|                  | rs6801017   | -0.202 | 0.031 | 3.80E-11  | -0.040 | 0.049 | 0.412 |
|                  | rs73754360  | 0.384  | 0.080 | 1.78E-06  | -0.026 | 0.104 | 0.800 |
|                  | rs75857200  | 0.199  | 0.042 | 2.34E-06  | -0.003 | 0.075 | 0.973 |
|                  | rs7623802   | -0.129 | 0.027 | 1.41E-06  | 0.080  | 0.045 | 0.074 |
|                  | rs78129851  | 0.793  | 0.117 | 1.07E-11  | -0.219 | 0.267 | 0.411 |
| <hr/>            |             |        |       |           |        |       |       |
|                  | rs1024949   | -0.448 | 0.040 | 2.95E-29  | -0.010 | 0.063 | 0.872 |
|                  | rs113553332 | 0.685  | 0.056 | 4.68E-34  | 0.024  | 0.067 | 0.718 |
|                  | rs13059920  | 0.420  | 0.038 | 9.33E-29  | 0.056  | 0.061 | 0.355 |
|                  | rs13084868  | 0.178  | 0.039 | 4.27E-06  | -0.031 | 0.041 | 0.453 |
|                  | rs148996090 | 1.111  | 0.137 | 3.98E-16  | 0.240  | 0.262 | 0.360 |
|                  | rs1607264   | -0.146 | 0.031 | 2.82E-06  | 0.072  | 0.044 | 0.101 |
|                  | rs16969649  | -0.140 | 0.031 | 4.90E-06  | -0.015 | 0.034 | 0.666 |
|                  | rs1988743   | 0.135  | 0.028 | 1.51E-06  | -0.026 | 0.041 | 0.529 |
|                  | rs2885370   | -0.209 | 0.031 | 8.91E-12  | 0.037  | 0.048 | 0.442 |
|                  | rs3935774   | 0.741  | 0.112 | 3.55E-11  | -0.035 | 0.094 | 0.711 |
|                  | rs41268633  | -0.251 | 0.050 | 6.03E-07  | 0.224  | 0.113 | 0.047 |
|                  | rs4624606   | -0.925 | 0.025 | 1.00E-200 | 0.001  | 0.043 | 0.975 |
|                  | rs4687154   | -0.581 | 0.040 | 7.94E-49  | 0.019  | 0.066 | 0.776 |
| ebi-a-GCST010783 | rs4815878   | 0.155  | 0.030 | 1.95E-07  | 0.107  | 0.045 | 0.017 |
|                  | rs5753690   | 0.149  | 0.029 | 2.95E-07  | 0.047  | 0.033 | 0.150 |
|                  | rs61492644  | -0.124 | 0.025 | 7.41E-07  | 0.011  | 0.042 | 0.784 |
|                  | rs62116908  | -0.294 | 0.064 | 3.72E-06  | 0.018  | 0.080 | 0.818 |
|                  | rs62196769  | -0.205 | 0.044 | 3.09E-06  | -0.021 | 0.049 | 0.668 |
|                  | rs6444430   | 0.154  | 0.033 | 2.29E-06  | 0.022  | 0.070 | 0.752 |
|                  | rs6444435   | -0.171 | 0.026 | 5.37E-11  | -0.049 | 0.041 | 0.227 |
|                  | rs6461953   | -0.146 | 0.032 | 4.68E-06  | 0.043  | 0.035 | 0.215 |
|                  | rs67249092  | -0.379 | 0.035 | 5.25E-28  | 0.000  | 0.051 | 0.995 |
|                  | rs6796131   | -0.244 | 0.026 | 1.51E-20  | -0.040 | 0.029 | 0.175 |
|                  | rs6801017   | -0.202 | 0.031 | 3.80E-11  | 0.037  | 0.044 | 0.398 |
|                  | rs73754360  | 0.384  | 0.080 | 1.78E-06  | 0.074  | 0.075 | 0.324 |
|                  | rs75857200  | 0.199  | 0.042 | 2.34E-06  | 0.065  | 0.062 | 0.295 |
|                  | rs7623802   | -0.129 | 0.027 | 1.41E-06  | -0.042 | 0.029 | 0.148 |
|                  | rs78129851  | 0.793  | 0.117 | 1.07E-11  | -0.025 | 0.143 | 0.860 |

COVID-19: Corona Virus Disease 2019; GWAS ID: Genome wide association study identity; SNP: single-nucleotide polymorphism; Beta is the regression coefficient based on the IL-1A, IL-1B, IL-1R1, IL-1Ra, and IL-1Racp raising allele (effect allele); SE: standard error.

**Supplementary table 3. Pleiotropy and heterogeneity test of IL-1A, IL-1B, IL-1R1, IL-1Ra, and IL-1Racp genetic IVs in COVID-19 GWAS dataset.**

| Exposure | GWAS ID          | Pleiotropy test |      |              |              | Heterogeneity test |      |              |       |      |              |
|----------|------------------|-----------------|------|--------------|--------------|--------------------|------|--------------|-------|------|--------------|
|          |                  | MR_Egger        |      |              | PRESSO       | MR Egger           |      |              | IVW   |      |              |
|          |                  | Intercept       | SE   | <i>p</i> val | <i>p</i> val | Q                  | Q_df | <i>p</i> val | Q     | Q_df | <i>p</i> val |
| IL-1A    | ebi-a-GCST010775 | -0.08           | 0.18 | 0.67         | 0.16         | 23.63              | 16   | 0.10         | 23.90 | 17   | 0.12         |
|          | ebi-a-GCST010776 | 0.02            | 0.02 | 0.16         | 0.04         | 26.34              | 17   | 0.07         | 29.76 | 18   | 0.04         |
|          | ebi-a-GCST010777 | 0.04            | 0.02 | 0.02         | 0.16         | 16.76              | 17   | 0.47         | 23.79 | 18   | 0.16         |
|          | ebi-a-GCST010778 | 0.04            | 0.02 | 0.02         | 0.15         | 16.76              | 17   | 0.47         | 23.79 | 18   | 0.16         |
|          | ebi-a-GCST010779 | 0.03            | 0.02 | 0.26         | 0.17         | 22.26              | 17   | 0.18         | 24.00 | 18   | 0.16         |
|          | ebi-a-GCST010780 | 0.02            | 0.02 | 0.27         | 0.03         | 28.90              | 17   | 0.04         | 31.06 | 18   | 0.03         |
|          | ebi-a-GCST010781 | 0.01            | 0.02 | 0.56         | 0.65         | 15.01              | 17   | 0.59         | 15.36 | 18   | 0.64         |
|          | ebi-a-GCST010782 | 0.09            | 0.04 | 0.04         | 0.46         | 13.43              | 17   | 0.71         | 18.28 | 18   | 0.44         |
|          | ebi-a-GCST010783 | 0.02            | 0.03 | 0.41         | 0.23         | 21.65              | 17   | 0.20         | 22.55 | 18   | 0.21         |
| IL-1B    | ebi-a-GCST010775 | 0.02            | 0.21 | 0.93         | 0.35         | 5.32               | 4    | 0.26         | 5.33  | 5    | 0.38         |
|          | ebi-a-GCST010776 | -0.01           | 0.02 | 0.53         | 0.80         | 1.90               | 4    | 0.75         | 2.37  | 5    | 0.80         |
|          | ebi-a-GCST010777 | 0.00            | 0.02 | 0.80         | 0.83         | 2.46               | 4    | 0.65         | 2.53  | 5    | 0.77         |
|          | ebi-a-GCST010778 | 0.00            | 0.02 | 0.80         | 0.83         | 2.46               | 4    | 0.65         | 2.53  | 5    | 0.77         |
|          | ebi-a-GCST010779 | -0.06           | 0.03 | 0.09         | 0.20         | 3.33               | 4    | 0.50         | 8.32  | 5    | 0.14         |
|          | ebi-a-GCST010780 | -0.02           | 0.02 | 0.25         | 0.67         | 1.81               | 4    | 0.77         | 3.62  | 5    | 0.61         |
|          | ebi-a-GCST010781 | -0.02           | 0.03 | 0.66         | 0.69         | 2.49               | 4    | 0.65         | 2.71  | 5    | 0.74         |
|          | ebi-a-GCST010782 | -0.05           | 0.05 | 0.37         | 0.33         | 4.85               | 4    | 0.30         | 6.11  | 5    | 0.30         |
|          | ebi-a-GCST010783 | -0.03           | 0.04 | 0.54         | 0.48         | 4.49               | 4    | 0.34         | 4.99  | 5    | 0.42         |
| IL-1R1   | ebi-a-GCST010775 | 0.05            | 0.12 | 0.68         | 0.94         | 8.70               | 16   | 0.93         | 8.88  | 17   | 0.94         |
|          | ebi-a-GCST010776 | 0.02            | 0.01 | 0.10         | 0.63         | 13.01              | 18   | 0.79         | 16.02 | 19   | 0.66         |
|          | ebi-a-GCST010777 | 0.01            | 0.01 | 0.29         | 0.69         | 14.02              | 18   | 0.73         | 15.24 | 19   | 0.71         |
|          | ebi-a-GCST010778 | 0.01            | 0.01 | 0.29         | 0.70         | 14.02              | 18   | 0.73         | 15.24 | 19   | 0.71         |
|          | ebi-a-GCST010779 | 0.00            | 0.02 | 0.88         | 0.70         | 15.19              | 18   | 0.65         | 15.22 | 19   | 0.71         |
|          | ebi-a-GCST010780 | 0.02            | 0.01 | 0.10         | 0.54         | 14.70              | 18   | 0.68         | 17.71 | 19   | 0.54         |
|          | ebi-a-GCST010781 | -0.01           | 0.02 | 0.71         | 0.37         | 20.16              | 18   | 0.32         | 20.31 | 19   | 0.38         |
|          | ebi-a-GCST010782 | -0.02           | 0.03 | 0.62         | 0.95         | 9.77               | 18   | 0.94         | 10.03 | 19   | 0.95         |
|          | ebi-a-GCST010783 | 0.01            | 0.02 | 0.65         | 0.92         | 10.96              | 18   | 0.90         | 11.18 | 19   | 0.92         |
| IL-1Ra   | ebi-a-GCST010775 | -0.05           | 0.19 | 0.80         | 0.62         | 6.09               | 7    | 0.53         | 6.16  | 8    | 0.63         |
|          | ebi-a-GCST010776 | -0.04           | 0.02 | 0.14         | 0.44         | 5.19               | 7    | 0.64         | 8.01  | 8    | 0.43         |
|          | ebi-a-GCST010777 | -0.03           | 0.03 | 0.36         | 0.05         | 14.62              | 7    | 0.04         | 16.65 | 8    | 0.03         |
|          | ebi-a-GCST010778 | -0.03           | 0.03 | 0.36         | 0.05         | 14.62              | 7    | 0.04         | 16.65 | 8    | 0.03         |
|          | ebi-a-GCST010779 | -0.01           | 0.03 | 0.69         | 0.47         | 7.11               | 7    | 0.42         | 7.29  | 8    | 0.51         |
|          | ebi-a-GCST010780 | -0.02           | 0.02 | 0.27         | 0.49         | 5.89               | 7    | 0.55         | 7.34  | 8    | 0.50         |
|          | ebi-a-GCST010781 | 0.03            | 0.05 | 0.57         | 0.28         | 11.47              | 8    | 0.18         | 11.97 | 9    | 0.22         |
|          | ebi-a-GCST010782 | 0.02            | 0.05 | 0.78         | 0.74         | 5.22               | 7    | 0.63         | 5.31  | 8    | 0.72         |
|          | ebi-a-GCST010783 | -0.07           | 0.05 | 0.18         | 0.61         | 4.10               | 7    | 0.77         | 6.33  | 8    | 0.61         |
| IL-1Racp | ebi-a-GCST010775 | -0.03           | 0.07 | 0.65         | 0.46         | 28.24              | 26   | 0.35         | 28.47 | 27   | 0.39         |
|          | ebi-a-GCST010776 | 0.00            | 0.01 | 0.81         | 0.83         | 20.10              | 26   | 0.79         | 20.16 | 27   | 0.82         |
|          | ebi-a-GCST010777 | -0.01           | 0.01 | 0.29         | 0.73         | 21.59              | 26   | 0.71         | 22.73 | 27   | 0.70         |
|          | ebi-a-GCST010778 | -0.01           | 0.01 | 0.29         | 0.74         | 21.59              | 26   | 0.71         | 22.73 | 27   | 0.70         |
|          | ebi-a-GCST010779 | 0.00            | 0.01 | 0.77         | 0.55         | 25.80              | 26   | 0.47         | 25.88 | 27   | 0.53         |
|          | ebi-a-GCST010780 | 0.00            | 0.01 | 0.70         | 0.70         | 22.58              | 26   | 0.66         | 22.73 | 27   | 0.70         |
|          | ebi-a-GCST010781 | 0.03            | 0.01 | 0.06         | 0.11         | 32.35              | 26   | 0.18         | 37.24 | 27   | 0.09         |
|          | ebi-a-GCST010782 | 0.00            | 0.02 | 0.89         | 0.63         | 24.64              | 26   | 0.54         | 24.66 | 27   | 0.59         |
|          | ebi-a-GCST010783 | 0.01            | 0.01 | 0.45         | 0.47         | 27.13              | 26   | 0.40         | 27.74 | 27   | 0.42         |

COVID-19: Corona Virus Disease 2019; GWAS ID: Genome wide association study identity. IVW: Inverse variance weighted. SE: standard error. *p* val > 0.05 represent no significant pleiotropy and heterogeneity.

**Supplementary table 4. The causal association of IL-1A, IL-1B, IL-1R1, IL-1Ra, and IL-1Racp with COVID-19.**

| Exposure         | GWAS ID          | Method          | n SNP  | Beta   | SE    | p val | OR    | OR_lci95 | OR_uci95 |
|------------------|------------------|-----------------|--------|--------|-------|-------|-------|----------|----------|
| IL-1A            | ebi-a-GCST010775 | MR Egger        | 18     | 0.086  | 1.147 | 0.941 | 1.090 | 0.115    | 10.317   |
|                  |                  | Weighted median | 18     | -0.022 | 0.447 | 0.961 | 0.979 | 0.408    | 2.349    |
|                  |                  | IVW             | 18     | -0.381 | 0.372 | 0.306 | 0.683 | 0.330    | 1.417    |
|                  |                  | Simple mode     | 18     | 0.208  | 0.702 | 0.771 | 1.231 | 0.311    | 4.877    |
|                  |                  | Weighted mode   | 18     | 0.208  | 0.637 | 0.748 | 1.231 | 0.353    | 4.290    |
|                  | ebi-a-GCST010776 | MR Egger        | 19     | -0.139 | 0.103 | 0.194 | 0.870 | 0.711    | 1.064    |
|                  |                  | Weighted median | 19     | 0.080  | 0.045 | 0.074 | 1.083 | 0.992    | 1.182    |
|                  |                  | IVW             | 19     | 0.002  | 0.041 | 0.961 | 1.002 | 0.926    | 1.085    |
|                  |                  | Simple mode     | 19     | 0.078  | 0.082 | 0.356 | 1.081 | 0.920    | 1.270    |
|                  |                  | Weighted mode   | 19     | 0.076  | 0.075 | 0.325 | 1.079 | 0.931    | 1.249    |
|                  | ebi-a-GCST010777 | MR Egger        | 19     | -0.247 | 0.096 | 0.020 | 0.781 | 0.647    | 0.944    |
|                  |                  | Weighted median | 19     | 0.044  | 0.050 | 0.384 | 1.045 | 0.947    | 1.153    |
|                  |                  | IVW             | 19     | -0.007 | 0.039 | 0.849 | 0.993 | 0.919    | 1.072    |
|                  |                  | Simple mode     | 19     | 0.113  | 0.101 | 0.278 | 1.120 | 0.918    | 1.366    |
|                  |                  | Weighted mode   | 19     | 0.121  | 0.091 | 0.202 | 1.128 | 0.944    | 1.349    |
|                  | ebi-a-GCST010778 | MR Egger        | 19     | -0.247 | 0.096 | 0.020 | 0.781 | 0.647    | 0.944    |
|                  |                  | Weighted median | 19     | 0.044  | 0.052 | 0.400 | 1.045 | 0.944    | 1.157    |
|                  |                  | IVW             | 19     | -0.007 | 0.039 | 0.849 | 0.993 | 0.919    | 1.072    |
|                  |                  | Simple mode     | 19     | 0.113  | 0.106 | 0.298 | 1.120 | 0.910    | 1.378    |
|                  |                  | Weighted mode   | 19     | 0.121  | 0.085 | 0.171 | 1.128 | 0.956    | 1.332    |
|                  | ebi-a-GCST010779 | MR Egger        | 19     | -0.155 | 0.139 | 0.279 | 0.856 | 0.653    | 1.124    |
|                  |                  | Weighted median | 19     | 0.029  | 0.067 | 0.666 | 1.029 | 0.902    | 1.174    |
|                  |                  | IVW             | 19     | -0.008 | 0.055 | 0.887 | 0.992 | 0.891    | 1.105    |
|                  |                  | Simple mode     | 19     | 0.059  | 0.124 | 0.642 | 1.060 | 0.832    | 1.352    |
|                  |                  | Weighted mode   | 19     | 0.091  | 0.117 | 0.444 | 1.096 | 0.871    | 1.378    |
|                  | ebi-a-GCST010780 | MR Egger        | 19     | -0.090 | 0.099 | 0.374 | 0.914 | 0.752    | 1.109    |
|                  |                  | Weighted median | 19     | 0.059  | 0.041 | 0.150 | 1.061 | 0.979    | 1.150    |
|                  |                  | IVW             | 19     | 0.013  | 0.037 | 0.717 | 1.013 | 0.943    | 1.089    |
| Simple mode      |                  | 19              | 0.065  | 0.069  | 0.358 | 1.067 | 0.933 | 1.220    |          |
| Weighted mode    |                  | 19              | 0.078  | 0.071  | 0.285 | 1.082 | 0.941 | 1.243    |          |
| ebi-a-GCST010781 | MR Egger         | 19              | -0.104 | 0.153  | 0.506 | 0.902 | 0.668 | 1.216    |          |
|                  | Weighted median  | 19              | 0.000  | 0.077  | 0.997 | 1.000 | 0.860 | 1.163    |          |
|                  | IVW              | 19              | -0.019 | 0.056  | 0.728 | 0.981 | 0.880 | 1.094    |          |
|                  | Simple mode      | 19              | 0.046  | 0.150  | 0.765 | 1.047 | 0.780 | 1.405    |          |
|                  | Weighted mode    | 19              | 0.094  | 0.142  | 0.516 | 1.099 | 0.832 | 1.452    |          |
| ebi-a-GCST010782 | MR Egger         | 19              | -0.716 | 0.264  | 0.015 | 0.489 | 0.292 | 0.819    |          |
|                  | Weighted median  | 19              | -0.189 | 0.129  | 0.144 | 0.828 | 0.643 | 1.066    |          |
|                  | IVW              | 19              | -0.171 | 0.092  | 0.063 | 0.843 | 0.704 | 1.009    |          |
|                  | Simple mode      | 19              | -0.372 | 0.255  | 0.161 | 0.689 | 0.418 | 1.136    |          |
|                  | Weighted mode    | 19              | -0.275 | 0.234  | 0.254 | 0.759 | 0.480 | 1.200    |          |
| ebi-a-GCST010783 | MR Egger         | 19              | -0.169 | 0.176  | 0.350 | 0.844 | 0.598 | 1.192    |          |
|                  | Weighted median  | 19              | -0.004 | 0.092  | 0.962 | 0.996 | 0.831 | 1.193    |          |
|                  | IVW              | 19              | -0.035 | 0.073  | 0.630 | 0.965 | 0.837 | 1.114    |          |
|                  | Simple mode      | 19              | 0.095  | 0.166  | 0.572 | 1.100 | 0.795 | 1.523    |          |
|                  | Weighted mode    | 19              | 0.066  | 0.142  | 0.646 | 1.069 | 0.809 | 1.412    |          |
| ebi-a-GCST010775 | MR Egger         | 6               | -1.451 | 1.548  | 0.402 | 0.234 | 0.011 | 4.873    |          |
|                  | Weighted median  | 6               | -0.615 | 0.886  | 0.488 | 0.541 | 0.095 | 3.069    |          |
|                  | IVW              | 6               | -1.332 | 0.684  | 0.051 | 0.264 | 0.069 | 1.009    |          |
|                  | Simple mode      | 6               | -2.398 | 1.464  | 0.162 | 0.091 | 0.005 | 1.602    |          |
|                  | Weighted mode    | 6               | -0.192 | 1.125  | 0.871 | 0.825 | 0.091 | 7.487    |          |
| ebi-a-GCST010776 | MR Egger         | 6               | 0.030  | 0.139  | 0.842 | 1.030 | 0.784 | 1.353    |          |
|                  | Weighted median  | 6               | -0.072 | 0.089  | 0.421 | 0.931 | 0.781 | 1.109    |          |
|                  | IVW              | 6               | -0.054 | 0.066  | 0.412 | 0.947 | 0.833 | 1.078    |          |
|                  | Simple mode      | 6               | -0.051 | 0.116  | 0.677 | 0.950 | 0.758 | 1.192    |          |

|                  |                  |                 |        |        |       |       |       |       |       |
|------------------|------------------|-----------------|--------|--------|-------|-------|-------|-------|-------|
| IL-1B            | ebi-a-GCST010777 | Weighted mode   | 6      | -0.093 | 0.096 | 0.376 | 0.911 | 0.755 | 1.099 |
|                  |                  | MR Egger        | 6      | 0.105  | 0.132 | 0.472 | 1.110 | 0.858 | 1.437 |
|                  |                  | Weighted median | 6      | 0.087  | 0.082 | 0.285 | 1.091 | 0.930 | 1.280 |
|                  |                  | IVW             | 6      | 0.074  | 0.065 | 0.255 | 1.077 | 0.948 | 1.223 |
|                  |                  | Simple mode     | 6      | 0.112  | 0.112 | 0.362 | 1.118 | 0.899 | 1.391 |
|                  | ebi-a-GCST010778 | Weighted mode   | 6      | 0.078  | 0.095 | 0.449 | 1.081 | 0.898 | 1.301 |
|                  |                  | MR Egger        | 6      | 0.105  | 0.132 | 0.472 | 1.110 | 0.858 | 1.437 |
|                  |                  | Weighted median | 6      | 0.087  | 0.084 | 0.303 | 1.091 | 0.924 | 1.287 |
|                  |                  | IVW             | 6      | 0.074  | 0.065 | 0.255 | 1.077 | 0.948 | 1.223 |
|                  |                  | Simple mode     | 6      | 0.112  | 0.106 | 0.339 | 1.118 | 0.909 | 1.376 |
|                  | ebi-a-GCST010779 | Weighted mode   | 6      | 0.078  | 0.093 | 0.441 | 1.081 | 0.901 | 1.296 |
|                  |                  | MR Egger        | 6      | 0.487  | 0.199 | 0.070 | 1.628 | 1.102 | 2.403 |
|                  |                  | Weighted median | 6      | 0.188  | 0.130 | 0.148 | 1.207 | 0.935 | 1.559 |
|                  |                  | IVW             | 6      | 0.102  | 0.127 | 0.425 | 1.107 | 0.862 | 1.421 |
|                  |                  | Simple mode     | 6      | 0.274  | 0.183 | 0.194 | 1.315 | 0.919 | 1.881 |
|                  | ebi-a-GCST010780 | Weighted mode   | 6      | 0.228  | 0.154 | 0.199 | 1.256 | 0.928 | 1.700 |
|                  |                  | MR Egger        | 6      | 0.155  | 0.113 | 0.242 | 1.168 | 0.936 | 1.457 |
|                  |                  | Weighted median | 6      | 0.017  | 0.071 | 0.817 | 1.017 | 0.884 | 1.169 |
|                  |                  | IVW             | 6      | 0.023  | 0.056 | 0.682 | 1.023 | 0.917 | 1.142 |
|                  |                  | Simple mode     | 6      | 0.036  | 0.091 | 0.708 | 1.037 | 0.867 | 1.240 |
| ebi-a-GCST010781 | Weighted mode    | 6               | 0.026  | 0.082  | 0.760 | 1.027 | 0.874 | 1.206 |       |
|                  | MR Egger         | 6               | -0.058 | 0.241  | 0.822 | 0.944 | 0.589 | 1.512 |       |
|                  | Weighted median  | 6               | -0.215 | 0.141  | 0.126 | 0.806 | 0.612 | 1.063 |       |
|                  | IVW              | 6               | -0.159 | 0.109  | 0.146 | 0.853 | 0.689 | 1.057 |       |
|                  | Simple mode      | 6               | -0.225 | 0.207  | 0.328 | 0.799 | 0.532 | 1.199 |       |
| ebi-a-GCST010782 | Weighted mode    | 6               | -0.235 | 0.140  | 0.154 | 0.790 | 0.601 | 1.040 |       |
|                  | MR Egger         | 6               | 0.218  | 0.350  | 0.568 | 1.243 | 0.626 | 2.468 |       |
|                  | Weighted median  | 6               | 0.000  | 0.203  | 0.998 | 1.000 | 0.672 | 1.489 |       |
|                  | IVW              | 6               | -0.093 | 0.172  | 0.589 | 0.911 | 0.650 | 1.277 |       |
|                  | Simple mode      | 6               | -0.124 | 0.311  | 0.706 | 0.883 | 0.480 | 1.624 |       |
| ebi-a-GCST010783 | Weighted mode    | 6               | 0.111  | 0.236  | 0.658 | 1.117 | 0.704 | 1.774 |       |
|                  | MR Egger         | 6               | 0.134  | 0.287  | 0.665 | 1.143 | 0.651 | 2.006 |       |
|                  | Weighted median  | 6               | -0.159 | 0.169  | 0.345 | 0.853 | 0.612 | 1.187 |       |
|                  | IVW              | 6               | -0.035 | 0.128  | 0.786 | 0.966 | 0.751 | 1.242 |       |
|                  | Simple mode      | 6               | -0.122 | 0.267  | 0.667 | 0.885 | 0.524 | 1.494 |       |
| ebi-a-GCST010775 | Weighted mode    | 6               | -0.158 | 0.177  | 0.412 | 0.854 | 0.604 | 1.207 |       |
|                  | MR Egger         | 18              | -0.194 | 0.674  | 0.777 | 0.823 | 0.220 | 3.086 |       |
|                  | Weighted median  | 18              | 0.112  | 0.416  | 0.787 | 1.119 | 0.495 | 2.529 |       |
|                  | IVW              | 18              | 0.061  | 0.302  | 0.841 | 1.062 | 0.588 | 1.919 |       |
|                  | Simple mode      | 18              | 0.256  | 0.767  | 0.743 | 1.292 | 0.287 | 5.806 |       |
| ebi-a-GCST010776 | Weighted mode    | 18              | 0.221  | 0.728  | 0.765 | 1.247 | 0.299 | 5.196 |       |
|                  | MR Egger         | 20              | -0.134 | 0.061  | 0.041 | 0.875 | 0.777 | 0.985 |       |
|                  | Weighted median  | 20              | -0.027 | 0.040  | 0.501 | 0.974 | 0.900 | 1.053 |       |
|                  | IVW              | 20              | -0.041 | 0.028  | 0.148 | 0.960 | 0.908 | 1.015 |       |
|                  | Simple mode      | 20              | -0.015 | 0.079  | 0.854 | 0.985 | 0.843 | 1.151 |       |
| ebi-a-GCST010777 | Weighted mode    | 20              | -0.016 | 0.076  | 0.832 | 0.984 | 0.848 | 1.141 |       |
|                  | MR Egger         | 20              | -0.112 | 0.068  | 0.116 | 0.894 | 0.783 | 1.021 |       |
|                  | Weighted median  | 20              | -0.039 | 0.045  | 0.390 | 0.962 | 0.881 | 1.051 |       |
|                  | IVW              | 20              | -0.045 | 0.031  | 0.143 | 0.956 | 0.899 | 1.015 |       |
|                  | Simple mode      | 20              | -0.135 | 0.082  | 0.114 | 0.873 | 0.744 | 1.025 |       |
| ebi-a-GCST010778 | Weighted mode    | 20              | -0.024 | 0.081  | 0.770 | 0.976 | 0.834 | 1.143 |       |
|                  | MR Egger         | 20              | -0.112 | 0.068  | 0.116 | 0.894 | 0.783 | 1.021 |       |
|                  | Weighted median  | 20              | -0.039 | 0.041  | 0.347 | 0.962 | 0.888 | 1.043 |       |
|                  | IVW              | 20              | -0.045 | 0.031  | 0.143 | 0.956 | 0.899 | 1.015 |       |
|                  | Simple mode      | 20              | -0.135 | 0.085  | 0.128 | 0.873 | 0.739 | 1.032 |       |
| ebi-a-           | Weighted mode    | 20              | -0.024 | 0.081  | 0.771 | 0.976 | 0.834 | 1.144 |       |
|                  | MR Egger         | 20              | 0.041  | 0.097  | 0.678 | 1.042 | 0.862 | 1.260 |       |
|                  | Weighted median  | 20              | 0.028  | 0.059  | 0.641 | 1.028 | 0.915 | 1.155 |       |

|                  |                  |                 |        |        |       |       |       |       |        |
|------------------|------------------|-----------------|--------|--------|-------|-------|-------|-------|--------|
| IL-1R1           | ebi-a-GCST010779 | IVW             | 20     | 0.027  | 0.044 | 0.531 | 1.028 | 0.944 | 1.119  |
|                  |                  | Simple mode     | 20     | 0.029  | 0.114 | 0.801 | 1.030 | 0.823 | 1.288  |
|                  |                  | Weighted mode   | 20     | 0.029  | 0.105 | 0.785 | 1.030 | 0.838 | 1.266  |
|                  | ebi-a-GCST010780 | MR Egger        | 20     | -0.112 | 0.057 | 0.065 | 0.894 | 0.800 | 1.000  |
|                  |                  | Weighted median | 20     | 0.001  | 0.037 | 0.980 | 1.001 | 0.931 | 1.076  |
|                  |                  | IVW             | 20     | -0.024 | 0.026 | 0.352 | 0.976 | 0.928 | 1.027  |
|                  |                  | Simple mode     | 20     | -0.004 | 0.071 | 0.955 | 0.996 | 0.867 | 1.144  |
|                  | ebi-a-GCST010781 | Weighted mode   | 20     | -0.002 | 0.060 | 0.968 | 0.998 | 0.887 | 1.122  |
|                  |                  | MR Egger        | 20     | 0.039  | 0.113 | 0.735 | 1.040 | 0.833 | 1.297  |
|                  |                  | Weighted median | 20     | 0.026  | 0.075 | 0.726 | 1.026 | 0.887 | 1.188  |
|                  |                  | IVW             | 20     | 0.002  | 0.053 | 0.968 | 1.002 | 0.903 | 1.112  |
|                  | ebi-a-GCST010782 | Simple mode     | 20     | -0.006 | 0.146 | 0.970 | 0.995 | 0.747 | 1.325  |
|                  |                  | Weighted mode   | 20     | 0.028  | 0.127 | 0.826 | 1.029 | 0.801 | 1.321  |
|                  |                  | MR Egger        | 20     | 0.096  | 0.188 | 0.615 | 1.101 | 0.761 | 1.593  |
|                  |                  | Weighted median | 20     | 0.080  | 0.107 | 0.456 | 1.083 | 0.878 | 1.336  |
|                  | ebi-a-GCST010783 | IVW             | 20     | 0.010  | 0.083 | 0.906 | 1.010 | 0.858 | 1.189  |
|                  |                  | Simple mode     | 20     | 0.108  | 0.183 | 0.563 | 1.114 | 0.778 | 1.595  |
|                  |                  | Weighted mode   | 20     | 0.136  | 0.187 | 0.477 | 1.145 | 0.794 | 1.653  |
| MR Egger         |                  | 20              | 0.092  | 0.125  | 0.469 | 1.097 | 0.859 | 1.401 |        |
| ebi-a-GCST010783 | Weighted median  | 20              | 0.173  | 0.085  | 0.040 | 1.189 | 1.008 | 1.404 |        |
|                  | IVW              | 20              | 0.143  | 0.058  | 0.014 | 1.154 | 1.030 | 1.293 |        |
|                  | Simple mode      | 20              | 0.241  | 0.143  | 0.109 | 1.272 | 0.961 | 1.683 |        |
|                  | Weighted mode    | 20              | 0.235  | 0.131  | 0.089 | 1.265 | 0.978 | 1.635 |        |
| IL-1Ra           | ebi-a-GCST010775 | MR Egger        | 9      | 0.481  | 1.116 | 0.679 | 1.618 | 0.182 | 14.416 |
|                  |                  | Weighted median | 9      | -0.296 | 0.590 | 0.616 | 0.744 | 0.239 | 2.316  |
|                  |                  | IVW             | 9      | 0.214  | 0.433 | 0.621 | 1.238 | 0.530 | 2.891  |
|                  |                  | Simple mode     | 9      | -0.363 | 0.906 | 0.699 | 0.695 | 0.103 | 4.692  |
|                  | ebi-a-GCST010776 | Weighted mode   | 9      | -0.555 | 0.897 | 0.553 | 0.574 | 0.100 | 3.302  |
|                  |                  | MR Egger        | 9      | 0.184  | 0.136 | 0.220 | 1.202 | 0.920 | 1.570  |
|                  |                  | Weighted median | 9      | -0.073 | 0.067 | 0.282 | 0.930 | 0.819 | 1.057  |
|                  |                  | IVW             | 9      | -0.030 | 0.050 | 0.546 | 0.971 | 0.881 | 1.069  |
|                  | ebi-a-GCST010777 | Simple mode     | 9      | 0.099  | 0.114 | 0.412 | 1.104 | 0.897 | 1.359  |
|                  |                  | Weighted mode   | 9      | -0.075 | 0.101 | 0.479 | 0.928 | 0.755 | 1.140  |
|                  |                  | MR Egger        | 9      | 0.122  | 0.170 | 0.495 | 1.130 | 0.810 | 1.576  |
|                  |                  | Weighted median | 9      | 0.037  | 0.073 | 0.611 | 1.038 | 0.908 | 1.185  |
|                  | ebi-a-GCST010778 | IVW             | 9      | -0.029 | 0.072 | 0.685 | 0.971 | 0.843 | 1.118  |
|                  |                  | Simple mode     | 9      | -0.005 | 0.110 | 0.961 | 0.995 | 0.806 | 1.227  |
|                  |                  | Weighted mode   | 9      | 0.031  | 0.073 | 0.686 | 1.031 | 0.880 | 1.208  |
|                  |                  | MR Egger        | 9      | 0.122  | 0.170 | 0.495 | 1.130 | 0.810 | 1.576  |
|                  | ebi-a-GCST010779 | Weighted median | 9      | 0.037  | 0.073 | 0.611 | 1.038 | 0.903 | 1.192  |
|                  |                  | IVW             | 9      | -0.029 | 0.072 | 0.685 | 0.971 | 0.843 | 1.118  |
| Simple mode      |                  | 9               | -0.005 | 0.104  | 0.959 | 0.995 | 0.806 | 1.227 |        |
| Weighted mode    |                  | 9               | 0.031  | 0.076  | 0.695 | 1.031 | 0.887 | 1.199 |        |
| ebi-a-GCST010780 | MR Egger         | 9               | 0.120  | 0.184  | 0.535 | 1.127 | 0.787 | 1.616 |        |
|                  | Weighted median  | 9               | 0.160  | 0.099  | 0.106 | 1.173 | 0.967 | 1.423 |        |
|                  | IVW              | 9               | 0.050  | 0.073  | 0.492 | 1.051 | 0.912 | 1.212 |        |
|                  | Simple mode      | 9               | 0.177  | 0.134  | 0.223 | 1.193 | 0.915 | 1.557 |        |
| ebi-a-GCST010781 | Weighted mode    | 9               | 0.175  | 0.108  | 0.143 | 1.191 | 0.950 | 1.495 |        |
|                  | MR Egger         | 9               | 0.097  | 0.105  | 0.387 | 1.101 | 0.897 | 1.352 |        |
|                  | Weighted median  | 9               | 0.022  | 0.059  | 0.706 | 1.023 | 0.914 | 1.144 |        |
|                  | IVW              | 9               | -0.019 | 0.042  | 0.657 | 0.981 | 0.903 | 1.067 |        |
| ebi-a-GCST010781 | Simple mode      | 9               | 0.082  | 0.100  | 0.435 | 1.086 | 0.908 | 1.298 |        |
|                  | Weighted mode    | 9               | 0.049  | 0.078  | 0.546 | 1.051 | 0.906 | 1.218 |        |
|                  | MR Egger         | 10              | -0.113 | 0.312  | 0.726 | 0.893 | 0.485 | 1.645 |        |
|                  | Weighted median  | 10              | -0.035 | 0.120  | 0.768 | 0.965 | 0.767 | 1.215 |        |
| ebi-a-GCST010781 | IVW              | 10              | 0.060  | 0.101  | 0.554 | 1.062 | 0.870 | 1.296 |        |
|                  | Simple mode      | 10              | 0.031  | 0.174  | 0.864 | 1.031 | 0.744 | 1.429 |        |
|                  | Weighted mode    | 10              | -0.023 | 0.126  | 0.858 | 0.977 | 0.758 | 1.260 |        |

|                           |                 |    |        |       |       |       |       |       |
|---------------------------|-----------------|----|--------|-------|-------|-------|-------|-------|
| ebi-a-GCST010782          | MR Egger        | 9  | -0.090 | 0.292 | 0.767 | 0.914 | 0.516 | 1.619 |
|                           | Weighted median | 9  | 0.013  | 0.173 | 0.938 | 1.014 | 0.723 | 1.422 |
|                           | IVW             | 9  | -0.014 | 0.129 | 0.914 | 0.986 | 0.766 | 1.269 |
|                           | Simple mode     | 9  | 0.171  | 0.265 | 0.537 | 1.187 | 0.702 | 2.005 |
|                           | Weighted mode   | 9  | 0.010  | 0.196 | 0.962 | 1.010 | 0.690 | 1.477 |
| ebi-a-GCST010783          | MR Egger        | 9  | 0.523  | 0.275 | 0.099 | 1.687 | 0.984 | 2.892 |
|                           | Weighted median | 9  | 0.258  | 0.138 | 0.061 | 1.294 | 1.003 | 1.670 |
|                           | IVW             | 9  | 0.141  | 0.101 | 0.163 | 1.152 | 0.944 | 1.404 |
|                           | Simple mode     | 9  | 0.280  | 0.202 | 0.202 | 1.324 | 0.879 | 1.993 |
|                           | Weighted mode   | 9  | 0.280  | 0.163 | 0.123 | 1.324 | 0.953 | 1.838 |
| ebi-a-GCST010775          | MR Egger        | 28 | 0.174  | 0.207 | 0.409 | 1.190 | 0.793 | 1.785 |
|                           | Weighted median | 28 | 0.141  | 0.180 | 0.432 | 1.152 | 0.810 | 1.637 |
|                           | IVW             | 28 | 0.100  | 0.128 | 0.435 | 1.105 | 0.860 | 1.418 |
|                           | Simple mode     | 28 | 0.061  | 0.332 | 0.855 | 1.063 | 0.554 | 2.039 |
|                           | Weighted mode   | 28 | 0.143  | 0.171 | 0.410 | 1.154 | 0.825 | 1.615 |
| ebi-a-GCST010776          | MR Egger        | 28 | 0.010  | 0.023 | 0.647 | 1.011 | 0.967 | 1.056 |
|                           | Weighted median | 28 | 0.001  | 0.020 | 0.947 | 1.001 | 0.963 | 1.041 |
|                           | IVW             | 28 | 0.015  | 0.014 | 0.280 | 1.015 | 0.988 | 1.043 |
|                           | Simple mode     | 28 | -0.014 | 0.034 | 0.678 | 0.986 | 0.923 | 1.053 |
|                           | Weighted mode   | 28 | 0.004  | 0.020 | 0.864 | 1.004 | 0.964 | 1.044 |
| ebi-a-GCST010777          | MR Egger        | 28 | 0.028  | 0.024 | 0.263 | 1.028 | 0.981 | 1.078 |
|                           | Weighted median | 28 | 0.004  | 0.021 | 0.833 | 1.004 | 0.964 | 1.046 |
|                           | IVW             | 28 | 0.007  | 0.014 | 0.633 | 1.007 | 0.979 | 1.036 |
|                           | Simple mode     | 28 | 0.040  | 0.034 | 0.247 | 1.041 | 0.974 | 1.112 |
|                           | Weighted mode   | 28 | 0.009  | 0.021 | 0.674 | 1.009 | 0.968 | 1.052 |
| ebi-a-GCST010778          | MR Egger        | 28 | 0.028  | 0.024 | 0.263 | 1.028 | 0.981 | 1.078 |
|                           | Weighted median | 28 | 0.004  | 0.021 | 0.837 | 1.004 | 0.963 | 1.048 |
|                           | IVW             | 28 | 0.007  | 0.014 | 0.633 | 1.007 | 0.979 | 1.036 |
|                           | Simple mode     | 28 | 0.040  | 0.035 | 0.258 | 1.041 | 0.972 | 1.114 |
|                           | Weighted mode   | 28 | 0.009  | 0.019 | 0.634 | 1.009 | 0.972 | 1.047 |
| IL-1Racp ebi-a-GCST010779 | MR Egger        | 28 | 0.008  | 0.033 | 0.802 | 1.008 | 0.945 | 1.076 |
|                           | Weighted median | 28 | -0.005 | 0.029 | 0.872 | 0.995 | 0.940 | 1.054 |
|                           | IVW             | 28 | 0.016  | 0.020 | 0.430 | 1.016 | 0.977 | 1.057 |
|                           | Simple mode     | 28 | 0.035  | 0.052 | 0.499 | 1.036 | 0.936 | 1.146 |
|                           | Weighted mode   | 28 | 0.005  | 0.027 | 0.840 | 1.006 | 0.954 | 1.060 |
| ebi-a-GCST010780          | MR Egger        | 28 | 0.002  | 0.019 | 0.909 | 1.002 | 0.965 | 1.041 |
|                           | Weighted median | 28 | -0.009 | 0.018 | 0.628 | 0.992 | 0.958 | 1.026 |
|                           | IVW             | 28 | 0.008  | 0.012 | 0.482 | 1.008 | 0.985 | 1.032 |
|                           | Simple mode     | 28 | 0.011  | 0.027 | 0.689 | 1.011 | 0.959 | 1.065 |
|                           | Weighted mode   | 28 | 0.002  | 0.016 | 0.898 | 1.002 | 0.971 | 1.034 |
| ebi-a-GCST010781          | MR Egger        | 28 | -0.001 | 0.043 | 0.986 | 0.999 | 0.918 | 1.088 |
|                           | Weighted median | 28 | 0.046  | 0.035 | 0.184 | 1.047 | 0.978 | 1.121 |
|                           | IVW             | 28 | 0.067  | 0.028 | 0.018 | 1.069 | 1.011 | 1.130 |
|                           | Simple mode     | 28 | 0.019  | 0.064 | 0.765 | 1.020 | 0.899 | 1.156 |
|                           | Weighted mode   | 28 | 0.033  | 0.033 | 0.317 | 1.034 | 0.970 | 1.102 |
| ebi-a-GCST010782          | MR Egger        | 28 | 0.008  | 0.062 | 0.900 | 1.008 | 0.892 | 1.139 |
|                           | Weighted median | 28 | -0.007 | 0.055 | 0.901 | 0.993 | 0.893 | 1.105 |
|                           | IVW             | 28 | 0.015  | 0.038 | 0.695 | 1.015 | 0.943 | 1.092 |
|                           | Simple mode     | 28 | 0.036  | 0.085 | 0.677 | 1.037 | 0.877 | 1.225 |
|                           | Weighted mode   | 28 | 0.003  | 0.055 | 0.964 | 1.003 | 0.901 | 1.116 |
| ebi-a-GCST010783          | MR Egger        | 28 | -0.005 | 0.047 | 0.918 | 0.995 | 0.908 | 1.090 |
|                           | Weighted median | 28 | -0.001 | 0.041 | 0.988 | 0.999 | 0.922 | 1.083 |
|                           | IVW             | 28 | 0.023  | 0.029 | 0.419 | 1.023 | 0.968 | 1.082 |
|                           | Simple mode     | 28 | 0.018  | 0.064 | 0.782 | 1.018 | 0.898 | 1.155 |
|                           | Weighted mode   | 28 | 0.009  | 0.039 | 0.818 | 1.009 | 0.935 | 1.089 |

COVID-19: Corona Virus Disease 2019; GWAS ID: Genome wide association study identity. IVW: Inverse



variance weighted. Beta: the regression coefficient based on the vitamin C raising effect allele. nsnp: the number of single-nucleotide polymorphism. SE: standard error.  $p < 0.05$  represents the causal association of IL-1A, IL-1B, IL-1R1, IL-1Ra, and IL-1Racp levels with COVID-19. OR: Odds ratio. OR\_lci95: Lower limit of 95% confidence interval for OR. OR\_uci95: Upper limit of 95% confidence interval for OR.
